# Supplementary material for: Can propensity score matching be applied to cross-sectional data to evaluate Community-Based Rehabilitation? Results of a survey implementing the WHO’s Community-Based Rehabilitation indicators in Vietnam
Source: PubMed Central journal article supplement — BMJ Open. 2019 Feb 1;9(1):e022544. doi: 10.1136/bmjopen-2018-022544 (PMC6361336; doi:10.1136/bmjopen-2018-022544), 2019-02-01
Supplement: bmjopen-2018-022544.draft_revisions.pdf [file bmjopen-2018-022544.draft_revisions.pdf]

# BMJ Open

BMJ Open is committed to open peer review. As part of this commitment we make the peer review history of every article we publish publicly available.

When an article is published we post the peer reviewers' comments and the authors' responses online. We also post the versions of the paper that were used during peer review. These are the versions that the peer review comments apply to.

The versions of the paper that follow are the versions that were submitted during the peer review process. They are not the versions of record or the final published versions. They should not be cited or distributed as the published version of this manuscript.

BMJ Open is an open access journal and the full, final, typeset and author-corrected version of record of the manuscript is available on our site with no access controls, subscription charges or pay-per-view fees (<http://bmjopen.bmj.com>).

If you have any questions on BMJ Open's open peer review process please email [info.bmjopen@bmj.com](mailto:info.bmjopen@bmj.com)

# BMJ Open

## Evaluating Community-based Rehabilitation: can propensity score matching be applied to cross-sectional data?

|                               |                                                                                                                                                                                                                                                                                        |
|-------------------------------|----------------------------------------------------------------------------------------------------------------------------------------------------------------------------------------------------------------------------------------------------------------------------------------|
| Journal:                      | <i>BMJ Open</i>                                                                                                                                                                                                                                                                        |
| Manuscript ID                 | bmjopen-2018-022544                                                                                                                                                                                                                                                                    |
| Article Type:                 | Research                                                                                                                                                                                                                                                                               |
| Date Submitted by the Author: | 22-Feb-2018                                                                                                                                                                                                                                                                            |
| Complete List of Authors:     | Mason, Catherine; LMU Munich, Department for Medical Information Processing, Biometry and Epidemiology (IBE)<br>Sabariego, Carla; Ludwig-Maximilians University, Public Health and Health Services Research<br>Thắng, Đoàn Mạnh ; Hoa Binh Department of Health<br>Weber, Jörg; CBM eV |
| Keywords:                     | epidemiological methods, disability, social inequalities                                                                                                                                                                                                                               |
|                               |                                                                                                                                                                                                                                                                                        |

SCHOLARONE™  
Manuscripts

Peer Review Only

1  
2  
3 Evaluating Community-based Rehabilitation: can propensity score matching be applied to  
4 cross-sectional data?  
5  
6  
7

8  
9 Authors: Catherine Mason<sup>1\*</sup>, Carla Sabariego<sup>1</sup>, Đoàn Mạnh Thắng<sup>2</sup>, Joerg Weber<sup>3</sup>  
10

11 <sup>1</sup> Department for Medical Information Processing, Biometry and Epidemiology (IBE)  
12 Ludwig-Maximilians-Universität München  
13 Marchioninistraße 15  
14 81377 Munich, Germany  
15  
16

17 [Catherine.Mason@med.uni-muenchen.de](mailto:Catherine.Mason@med.uni-muenchen.de)

18 +49 (0)89 2180-78229  
19  
20

21 <sup>2</sup> Hoa Binh Department of Health (Sở Y tế tỉnh Hòa Bình)  
22 Hoa Binh City, Vietnam  
23

24 <sup>3</sup> CBM International  
25 Bensheim, Germany  
26  
27  
28

29 Keywords: disability, epidemiological methods, social inequalities  
30

31 Word count: 3019  
32  
33  
34  
35  
36  
37  
38  
39  
40  
41  
42  
43  
44  
45  
46  
47  
48  
49  
50  
51  
52  
53  
54  
55  
56  
57  
58  
59  
60

## ABSTRACT

**Objectives:** Community-Based Rehabilitation (CBR) is a multi-sectoral approach working to equalize opportunities and include people with disability in all aspects of life. The complexity of CBR and often limited resources lead to challenges when attempting to quantify its effectiveness, with randomization and longitudinal data rarely possible. Statistical methods, such as propensity score matching (PSM), offer an alternative approach to evaluate a treatment when randomization is not feasible. The aim of this study is to examine whether PSM can be an effective method to facilitate evaluations of results in CBR when data are cross-sectional.

**Design:** Cross-sectional survey

**Setting and Participants:** Data were collected using the World Health Organization's CBR Indicators in Vietnam, with treatment assignment (participating in CBR or not) determined by province of residence. 298 participants were selected through government records.

**Results:** PSM was conducted using one-to-one nearest neighbour method on ten covariates. Before matching, significant differences between groups were found for six of the ten covariates. PSM successfully adjusted for bias in all covariates in the matched sample (74 matched pairs). An independent t-test compared the outcome of "community inclusion" (a score based on selected indicators) between CBR and non-CBR participants both before and after matching, with CBR participants having significantly worse community inclusion scores than non-CBR participants. This result did not differ before and after matching.

**Conclusion:** PSM successfully reduced bias between groups, though this did not affect the tested outcome. PSM should be considered when analyzing cross-sectional CBR data, especially for international comparisons where differences between populations may be greater.

### Strengths and limitations of this study

- The complexity of CBR and often limited resources available in the field lead to challenges in research attempting to quantify its effectiveness and to a heavy reliance on non-randomized cross-sectional data, implying the need for statistical approaches, such as PSM, to account for these limitations.
- PSM attempts to mimic randomization by creating a sample of participants who received the treatment (CBR participants) that is comparable on all observed covariates to participants who did not receive the treatment (non-CBR participants).
- The potential of using PSM for analyzing cross-sectional CBR data was demonstrated, as biases detected in the distribution of covariates between groups before matching were successfully eliminated.
- One of the main advantages of the CBR Indicators, namely the ability to use comparison individuals without disability from the community is lost; as PSM requires that all participants have a non-zero probability of receiving treatment meaning only people with disabilities can be included.
- PSM only controls for known covariates which means that there is a potential for bias if some covariates that affect the outcome are not included.

## INTRODUCTION

Community-Based Rehabilitation (CBR) is a multi-sectoral approach working to equalize opportunities and include people with disability in all aspects of community life. It is broadly defined as “a strategy within general community development for the rehabilitation, equalization of opportunities and social inclusion of all people with disabilities”[1]. The wide scope of CBR is further expanded through the various implementing stakeholders involved in CBR, including people with disabilities themselves, their families and communities, and the relevant governmental and non-governmental service sectors. It is due, at least in part, to this extensive definition that reliable and internationally comparable data to monitor and evaluate CBR are scarce. In an effort to synthesize global perspectives on CBR, the World Health Organization (WHO) developed their “Community-Based Rehabilitation Guidelines” in 2010 which have since become accepted as a conceptual framework for CBR[2]. With these guidelines, WHO emphasized the need for a common global framework for monitoring CBR in line with the Convention on the Rights of Persons with Disability (CRPD). With the launch of the global WHO CBR Indicators in 2015, there is now a standardized approach to do this[3,4].

The complexity of CBR leads to challenges in research attempting to quantify its effectiveness[5-7]. Fully experimental studies with randomization are rarely possible for both ethical and practical reasons, which inherently lead to limitations. The possibility of bias arises as the apparent difference in an outcome between two treatment groups may depend on characteristics that affected whether or not an individual received a given treatment, instead of being an actual effect of the treatment. For this reason there has been a recent emphasis on so-called natural experiments, where a range of primarily statistical approaches are used to evaluate a treatment or intervention when randomization is not feasible[8]. One such approach is propensity score matching (PSM).

PSM was first presented in 1983 by Rosenbaum and Rubin as a method to reduce bias due to confounding variables in observational studies[9]. It attempts to mimic randomization by creating a sample of participants who received the treatment that is comparable on all observed covariates to participants who did not receive the treatment. This effectively creates an experimental dataset where the comparison group is, on average, equivalent to individuals in the exposed group on all observed covariates[10-12]. A systematic review comparing 21 PSM studies to 63 RCTs on therapeutic interventions for acute coronary syndromes found that PSM produced more extreme treatment effect estimates when compared with those from RCTs, although these differences were rarely statistically significant[13]. A similar comparison including 20 propensity-score-based studies matched to RCT results was conducted examining critical care medicine and found that propensity-score-based studies report less beneficial effects of treatment in comparison to RCTs[14]. Despite some shortcomings, PSM provides a method for evaluating complex interventions where randomization is not possible.

PSM has been increasingly used in various research fields, including Public Health, to evaluate complex interventions[15]. CBR is considered a complex intervention, and data collection in the field is further hindered by low resources making quantitative longitudinal data collection infeasible and rarely done[6,7,16,17]. This implies that data analysis in the field of CBR relies heavily on cross-sectional data. PSM has already been successfully applied to cross-sectional data[18,19]. Therefore, the main objective of this paper is to examine whether PSM can be an effective method to facilitate evaluations of results in CBR when data are cross-sectional. Data used in the present study were

collected using the WHO CBR Indicators in Vietnam in 2016 with the assignment of persons to the treatment (CBR participants) and non-treatment group (non-CBR participants) determined by province of residence. PSM will be conducted on the outcome of *community inclusion* of people with disabilities, the ultimate goal of CBR in strong alignment with the CRPD, using a sum score of WHO CBR social indicators and an empowerment indicator.

## METHODS

### Data Collection

Data collection was conducted using the survey questionnaire accompanying the WHO CBR Indicators[3]. These indicators examine differences in health, education, social life, livelihood and empowerment between people with disabilities and other community members. There are two subsets of indicators: base indicators which are broad and should be used in all data collection activities to ensure comparability, and supplementary indicators which can provide more specific coverage, and can be selected depending on the specific CBR goals and strategies of a program. The indicators and corresponding questions used in this paper are presented in Table 1.

Data collection involved a multi-site cross-sectional survey in 2016 in two Vietnamese provinces: Huế, where CBR is fully implemented and all districts have CBR coverage through government implementation and through non-governmental organizations' (NGO) activities; and Hòa Bình, where CBR is not implemented by either government or NGOs. An Android mobile phone application (app), available from WHO for the CBR Indicators, was used to collect data during interviews (app free to download at:

<http://play.google.com/store/apps/details?id=com.universaltools.whocbrsurvey&hl=en>).

People with disabilities were identified prior to the survey by government records. In both provinces a team of five local health care workers were trained by the lead researcher (CM) over two days on how to conduct interviews using the survey questions and the app. Data collection was supervised by CM. Data were collected anonymously and all respondents were informed of the purpose of the study, and then provided verbal (Huế) or written consent (Hòa Bình). In Huế the decision to provide verbal rather than written consent was justified since requiring written consent would embarrass illiterate participants, leading to a decreased willingness to answer further questions truthfully. In instances when the respondent had cognitive limitations that prevented them from being interviewed, or if the respondent was a minor, a proxy interview with a family member was performed. Ethical approval was obtained through the Ludwig-Maximilians-Universität Munich Ethics Commission.

### Variables

#### *Outcome Variable*

To measure community inclusion, a sum score was created from the social base and supplementary questions, with the addition of the base question from empowerment. These questions all used the same response scale of 1(*Not at all*) to 5(*Completely*) with the final sum score ranging from 4 to 33, with higher scores indicating higher levels of inclusion (Table 1).

**Table 1.** WHO CBR Indicators and questions used to measure them. Base indicators are shown in bold. The response option for all questions ranged from 1 (Not at all) to 5 (Completely).

| Component   | Indicator                                                                                             | Survey Question                                                                                                                              |
|-------------|-------------------------------------------------------------------------------------------------------|----------------------------------------------------------------------------------------------------------------------------------------------|
| Social      | <b>% of people with disability that feel valued as individuals by members of their community</b>      | Do you feel that other people respect you? For example, do you feel that others value you as a person and listen to what you have to say?    |
|             | % of people with disability who make their own decisions about the personal assistance they need      | Do you get to make decisions about the personal assistance that you need (who assists you, what type of assistance, when to get assistance)? |
|             | % of people with disability make their own decisions about their personal relationships               | Do you get to make your own decisions about your personal relationships, such as friends and family?                                         |
|             | % of people with disability who participate in artistic, cultural or religious activities             | Do you get to participate in artistic, cultural or religious activities?                                                                     |
|             | % of people with disability who participate in mainstream recreational, leisure and sports activities | Do you get to participate in community recreational, leisure and sports activities?                                                          |
|             | % of people with disability who know their legal rights                                               | To what extent do you know your legal rights?                                                                                                |
| Empowerment | <b>% of people with disability who make informed choices and decisions</b>                            | Do you get to make the big decisions in your life? For example, deciding who to live with, where to live, or how to spend your money?        |

### Matching Variables

Data on *age* and *gender* were collected. Age was collected in categories (0-5, 6-12, 13-17, 18-24, 25-44, 45-64, and 65+) which were dichotomized for the analysis[20]. Though data on disability severity were not available, *general health status* was used as a proxy, using the question “How would you rate your health today?”[21]. A variable for *socio-economic status* (SES) was created using a sum score based on the questions “What is the highest level of education you have achieved or are working to achieve?” and “Do you have enough money to meet your needs?”. The first question is commonly used in SES variable creation, and the second question targets wealth[22,23]. The variable *province of residence* corresponded to CBR coverage (no coverage in Hòa Bình, full CBR coverage in Huế). To account for economic differences between the provinces that might not be captured by SES, the covariate *receiving social protection* (such as for loss of income through old age, sickness or disability) was included. Covariates of *financial awareness* (knowing how to get financial services or social protection if needed), *having access to health services when needed*, and *having access to rehabilitation services when needed* were also included. A proxy for autonomy was captured through the covariates of *being involved in decision making regarding medical treatment* and *participating in a self-help group if desired*.

### Missing Data

Missing data were low (2.25%). Multiple imputation (five imputations) using fully conditional specification (MICE package in R Studio Version 0.99.903) was used to replace missing data.

### Analysis

#### Matching on the Propensity Score

The number of treated and untreated participants were similar (difference of  $n=4$ ). Therefore, participants were matched using one-to-one nearest neighbour technique, which matched each treated unit to one control that was closest using calipers of width equal to 0.25 of the standard deviation (SD) of the logit of the estimated propensity score[24]. This implies that for a given treated participant, all the untreated participants are identified whose scores are within this specified

distance and then the best match is formed. If no match falls within this distance the participant is excluded. Participants were matched on ten covariates (see *Matching Variables*).

### *Balance Diagnostics*

Baseline comparisons between the covariates were conducted before and after matching. Balance diagnosis was performed using the standardized difference method, which compares the difference in means of each covariate in units of the pooled standard deviation before and after matching[12]. Successful matching is indicated when the absolute standardized differences of means is less than 0.25[25].

### *Comparing Groups*

For the community inclusion outcome, data matched on the ten covariates were compared using an independent t-test, as it cannot be assumed that the outcomes of matched individuals are correlated[26]. Bootstrapping was performed (1000 samples) in order to produce 95% confidence intervals (CI), which has been shown to account for uncertainty in the matching procedure[20].

A sensitivity analysis was performed using the Rosenbaum Bounds for Hodges-Lehmann Point Estimate to assess how robust the findings were to hidden bias due to unobserved covariates ('rbounds' package in R Studio Version 0.99.903). The maximum Gamma (the odds of differential assignment to treatment due to unobserved factors) was set to 2 with increments of 0.1 to test at which point the between group differences are no longer robust[27].

Data cleaning was performed using SPSS version 23 (copyright IBM Corporation). PSM was performed in R Studio (Version 0.99.903) using the 'MatchIt' package.

## **RESULTS**

Data were available from 298 participants, of which 153(51.3%) were male, with a modal age group of 45-64(28.9%). The sample included 151 non-CBR participants and 147 CBR participants.

Before matching CBR participants had higher health status, were more likely to participate in a self-help group, more financially aware and more likely to be receiving social protection while they had worse access to rehabilitation services. Some age differences were also noted (Table 2). In the unmatched sample the absolute standardized difference across the 10 covariates ranged from 0.008 to 1.008 indicating bias.

When CBR participants were matched with non-CBR participants on the logit of the specified propensity score model, 74 matched pairs were formed. This meant that 49.7% of CBR participants were successfully matched to a control. PSM was successful in reducing bias between the covariates in the matched sample, as the standardized differences ranged from 0 to 0.147 with all values falling below the threshold value of 0.25[25] (Table 2).

**Table 2.** Baseline characteristics of CBR participants and non-CBR participants in the unmatched and matched samples. Absolute standardized differences of means are shown, with differences exceeding the threshold of 0.25 indicated in bold.

| Variable | Unmatched Sample |      |              | Matched Sample |      |              |
|----------|------------------|------|--------------|----------------|------|--------------|
|          | Mean             | Mean | Std. dif. of | Mean           | Mean | Std. dif. of |



|                                          |       | No CBR<br>(n=151) | With CBR<br>(n=147) | means        | No CBR<br>(n=74) | With CBR<br>(n=74) | means |
|------------------------------------------|-------|-------------------|---------------------|--------------|------------------|--------------------|-------|
| <b>Age</b>                               | 0-5   | 11 (7.2%)         | 6 (4.1%)            | 0.161        | 3 (4.1%)         | 5 (6.8%)           | 0.136 |
|                                          | 6-12  | 19 (12.6%)        | 11 (7.5%)           | 0.193        | 7 (9.5%)         | 5 (6.8%)           | 0.102 |
|                                          | 13-17 | 4 (2.6%)          | 6 (4.1%)            | 0.072        | 2 (2.7%)         | 1 (1.4%)           | 0.068 |
|                                          | 18-24 | 12 (7.9%)         | 12 (8.2%)           | 0.008        | 7 (9.5%)         | 7 (9.5%)           | 0.000 |
|                                          | 25-44 | 49 (32.5%)        | 32 (21.8%)          | <b>0.258</b> | 23 (31.1%)       | 22 (29.7%)         | 0.033 |
|                                          | 45-64 | 42 (27.8%)        | 44 (29.9%)          | 0.046        | 21 (28.4%)       | 26 (35.1%)         | 0.147 |
|                                          | 65+   | 14 (9.3%)         | 36 (24.5%)          | <b>0.353</b> | 11 (14.9%)       | 8 (10.8%)          | 0.094 |
| <b>Gender (male)</b>                     |       | 80 (53.0%)        | 73 (50.0%)          | 0.066        | 37 (50.0%)       | 42 (56.8%)         | 0.135 |
| <b>SES (range 1-10)</b>                  |       | 3.74±1.32         | 3.91±1.30           | 0.235        | 3.65±1.45        | 3.67±1.42          | 0.020 |
| <b>Health status (range 1-5)</b>         |       | 2.89±0.77         | 3.37±0.70           | <b>0.683</b> | 3.05±0.75        | 3.14±0.65          | 0.115 |
| <b>Receiving social protection</b>       |       | 74 (49.0%)        | 117 (79.6%)         | <b>1.008</b> | 48 (64.9%)       | 52 (70.3%)         | 0.141 |
| <b>Access to health services</b>         |       | 132 (87.4%)       | 126 (85.7%)         | 0.048        | 66 (89.2%)       | 66 (89.2%)         | 0.000 |
| <b>Access to rehabilitation services</b> |       | 128 (84.8%)       | 123 (83.7%)         | <b>0.263</b> | 29 (39.2%)       | 31 (41.9%)         | 0.054 |
| <b>Self-help group</b>                   |       | 63 (41.7%)        | 75 (51.0%)          | <b>0.396</b> | 31 (41.9%)       | 32 (43.2%)         | 0.027 |
| <b>Financial awareness</b>               |       | 73 (48.3%)        | 122 (83.0%)         | <b>0.789</b> | 51 (68.9%)       | 55 (74.3%)         | 0.134 |
| <b>Involved in treatment decisions</b>   |       | 47 (31.1%)        | 65 (44.2%)          | 0.137        | 65 (87.8%)       | 65 (87.8%)         | 0.000 |

Note: continuous variables are presented as means ± standard deviation; dichotomous variables are presented as N(%)

To test whether PSM affected the pre-defined outcome of community inclusion, the difference between groups before and after matching were assessed: similar significant differences were found. In the matched sample, CBR participants had worse community inclusion scores (mean=17.86, SD=6.30, 95%CI 16.33-19.24) than non-CBR participants (mean=20.93, SD=6.16, 95%CI 19.42-22.21);  $t(146)=2.996$ ,  $p=0.003$ . The sensitivity analysis corroborated the results, showing that CBR participants had a median difference in community inclusion score 3.5 points lower than non-CBR participants (Gamma=0). When the Gamma value was increased to 2, the upper and lower bounds did not include zero indicating robust results[27]. These results did not differ from the results before PSM: community inclusion for participants with CBR (mean=18.61, SD=5.38) and without CBR (mean=20.64, SD=6.49);  $t(296)=2.935$ ,  $p=0.004$ .

## DISCUSSION

To our knowledge, this study presents the first use of PSM as a method for analyzing cross-sectional data in the field of CBR. The study analyzed data collected using the WHO CBR Indicators, and found that community inclusion scores of CBR participants were significantly lower than those of non-CBR participants after PSM. Despite bias being detected in the distribution of covariates between groups before matching, the results before PSM did not significantly differ from those after. We conclude that PSM can be successfully applied to cross-sectional CBR data, though in this case the bias reduction provided by PSM did not affect the tested outcome.

PSM has been applied only to longitudinal CBR data so far, but PSM studies using cross-sectional data are available from other fields. These studies had similar results in terms of the methodological success of PSM, but unlike our study they had final outcomes in line with their hypotheses. One such example is the study from Jalan and Ravallion which examines the effect of an employment-based poverty reduction program on income gain, accounting for pre-intervention and foregone income[19]. Through the trial of three PSM methods, they were able to reduce the differences

1  
2  
3 between the two populations and to demonstrate the effectiveness of the program. Another such  
4 example is the study from Becerril and Abdulai showing the positive impact of new maize farming  
5 technologies on per capita poverty outcomes[18]. Similarly to our study, they detected bias in the  
6 distribution of covariates between groups before matching, indicating that accounting for bias  
7 though PSM was important. In the field of CBR, PSM has been used to evaluate longitudinal CBR data  
8 in India, looking at livelihood and health outcomes[28,29]. PSM was used to reduce the bias between  
9 the CBR and non-CBR groups, with results showing that CBR participants had better health and  
10 livelihood outcomes, and that these differences generally increased over time. As in our study, these  
11 studies all showed bias between groups before matching which were reduced in the matched sample  
12 after PSM. However, none of these studies presented their outcome results before matching for  
13 comparison, so it cannot be determined if their final results were unaffected by matching as is the  
14 case in our study.  
15  
16  
17

18 The results of the present study go against the anecdotal evidence that CBR has a positive influence  
19 on the lives of people with disabilities[6,7,30]. Results from longitudinal data indicate that CBR has a  
20 positive impact on receiving pensions, accessing paid jobs, accessing assistive devices, and personal-  
21 practical autonomy, with the impact increasing over time[28]. An explanation for our results could be  
22 that cross-sectional data do not allow causal inferences: results could simply point out that the  
23 province with highest problems has been selected for receiving CBR interventions. Additionally, this  
24 study focused on community inclusion - the ultimate goal of CBR - but when interpreting results it is  
25 also important to consider the specific targets of the program being examined. Though CBR aims to  
26 impact all aspects of the lives of people with disabilities, the program in Hué focuses specifically on  
27 improving the health of people with disabilities through physiotherapist visits and strengthening  
28 medical referral pathways. This could be a reason for the counter-intuitive results, and may  
29 demonstrate the importance of matching the indicators used with the targets of programs.  
30  
31  
32

33 To our knowledge, this study is the first to implement the recently developed WHO CRB  
34 Indicators[4]. The study highlights how important it is to collect standardized data in the field of CBR  
35 in order to facilitate comparisons between groups and determine effectiveness of programs. One of  
36 the main advantages of the CBR Indicators and their data collection strategy is that they are easy to  
37 use in the field. The indicators allow for descriptive comparisons to be made easily, but in order for  
38 indicators to be used appropriately it is important to go beyond these descriptive results using  
39 inferential statistics. Furthermore, no single indicator or even a set of indicators is capable of  
40 capturing all changes in dynamic settings. The use of indicators alone has the potential limitation of  
41 collecting meaningless or misleading information,[31] and therefore they should be used as part of a  
42 broad evaluation strategy, in combination with qualitative and participatory evaluations[30]. Another  
43 way to reduce the limitations arising from indicator use is to continually test and re-assess the  
44 indicators[31]. In the case of the CBR Indicators, a priority should be to do this in partnership with  
45 communities in order to promote their uptake.  
46  
47  
48  
49

50 The use of PSM as a method for analysis of cross-sectional data collected from the CBR Indicators is  
51 conceptually strong, due to its ability to reduce bias due to confounding variables in observational  
52 studies[9]. However, the methodological limitations of PSM also need to be considered. PSM  
53 requires that each participant has a non-zero probability of receiving treatment, meaning only  
54 people with disabilities can be included in the analysis. Due to this, one of the main advantages of  
55 the CBR Indicators, namely the ability to use comparison individuals from the community, is lost[4].  
56 Furthermore, PSM only controls for known covariates which means that there is a potential for bias if  
57  
58  
59  
60

1  
2  
3 some covariates that affect the outcome are not included[9]. For example, in this study no data were  
4 available on the ethnicity of participants, despite its known association with social disparities in  
5 Vietnam[32]. Another such covariate in this study could be disability severity, although this was  
6 partially adjusted for in both the participant selection, whereby all people with disabilities were  
7 identified using the same government disability criteria, and further in the analysis through the  
8 inclusion of the self-rated health covariate. Another limitation of PSM is that it leads to reduced  
9 sample size which could limit generalizability, though this is partly addressed through the provided  
10 sensitivity analysis. Further studies should look into additional statistical methods for analyzing the  
11 results obtained from the CBR Indicators.  
12  
13

14 Based on the present study, we recommend the further use and testing of the WHO CBR Indicators  
15 to increase standardized data collection in the field of CBR. In accompaniment to increased data  
16 collection, we recommend PSM as a method to reduce bias in cross-sectional CBR data analyses,  
17 especially for international comparisons where differences between populations may be greater than  
18 the within country differences observed in this study.  
19  
20

## 21 **CONCLUSION**

22  
23 This study presents the first use of PSM as a method for analyzing cross-sectional CBR data. While  
24 randomized and longitudinal data are ideal for evaluations, this type of data collection is often not  
25 feasible in the field of CBR due to its high complexity and limited resources. The potential of using  
26 PSM for analyzing cross-sectional CBR data was demonstrated, though further research should  
27 investigate alternative inferential methods, such as cluster matching or adjusted regression, which  
28 may be more suitable in allowing for the comparison of the differences between persons with and  
29 without disabilities in line with the WHO CBR Indicators. We recommend that the questions and  
30 indicators be continually reviewed, and that future cross-sectional CBR studies use PSM to reduce  
31 bias when comparing groups.  
32  
33  
34  
35  
36

## 37 **FUNDING**

38  
39 This research received no specific grant from any funding agency in the public, commercial or not-  
40 for-profit sectors.  
41

## 42 **COMPETING INTERESTS**

43  
44 The authors declare no competing interests.  
45

## 46 **DATA SHARING**

47  
48 The data are owned by the World Health Organization (WHO). Data are available from the WHO for  
49 researchers who meet the criteria for access to confidential data. Interested researchers can access  
50 the data by the same means the authors accessed them, by contacting WHO under  
51 [disability@who.int](mailto:disability@who.int). Statistical code is available from the corresponding author.  
52  
53

## 54 **ACKNOWLEDGEMENTS**

55  
56 The authors express gratitude to those from the Vietnamese Ministries and the local healthcare  
57 workers who lent their knowledge and field experience. Special thanks go out to the interviewers  
58  
59

1  
2  
3 who took the time to visit and speak with the participants; in Hue: Nguyen Thi Phung Diem, Nguyen  
4 Van Hong, Thuong Thi Huong Giang, Thian Cong Chirh, and Nguyen Thi Ngoc Anh and in Hoa Binh: Ha  
5 Thi Thoan, Vu Dury Hieu, Le Tleaal Hoa, Nguyen Quoc Dung, Le Vai Huy, and Nguyen Thanh.  
6

#### 7 **AUTHOR CONTRIBUTIONS**

8  
9 Conceptualization: CM JW CS  
10 Investigation: CM JW  
11 Methodology: CM JW CS  
12 Data curation: CM DMT  
13 Formal analysis: CM  
14 Project administration: CM JW CS  
15 Resources: CM JW CS DMT  
16 Supervision: CM DMT CS JW  
17 Writing – original draft: CM CS JW  
18 Writing – review & editing: CM JW CS DMT  
19  
20  
21  
22

#### 23 **REFERENCES**

- 24  
25 1 International Labour Organization, United Nations Educational, Scientific and Cultural Organization  
26 and the World Health Organization. CBR: A strategy for rehabilitation, equalization of  
27 opportunities, poverty reduction and social inclusion of people with disabilities: joint position  
28 paper. Geneva: World Health Organization, 2004.  
29 2 World Health Organization, United Nations Educational, Scientific and Cultural Organization, &  
30 International Labour Organization. Community-based rehabilitation: CBR Guidelines. Geneva:  
31 World Health Organization, 2010.  
32 3 World Health Organization, International Disability and Development Consortium. Capturing the  
33 difference we make- Community-based rehabilitation indicators manual. Geneva: World  
34 Health Organization, 2015.  
35 4 Mason C, Weber J, Atasoy S, et al. Development of indicators for monitoring Community-Based  
36 Rehabilitation. *PLoS One* 2017;12(6):e0178418.  
37 5 Finkenflügel H, Wolffers I, Huijsman R. The evidence base for community-based rehabilitation: a  
38 literature review. *Int J Rehabil Res* 2005;28(3):187-201.  
39 6 Cornielje H, Velema JP, Finkenflugel H. Community based rehabilitation programmes: Monitoring  
40 and evaluation in order to measure results. *Lepr Rev* 2008;79(1):36-49.  
41 7 Lemmi V, Blanchet K, Gibson LJ, et al. Community-based rehabilitation for people with physical and  
42 mental disabilities in low- and middle-income countries: a systematic review and meta-  
43 analysis. *Campbell Sys Rev* 2015;11(15).  
44 8 Craig P, Cooper C, Gunnell D, et al. Using natural experiments to evaluate population health  
45 interventions: new Medical Research Council guidance. *J Epidemiol Community Health*  
46 2012;jech-2011-200375.  
47 9 Rosenbaum PR, Rubin DB. The central role of the propensity score in observational studies for  
48 causal effects. *Biometrika* 1983;70(1):41-55.  
49 10 Heckman JJ, Ichimura H, Todd P. Matching as an econometric evaluation estimator. *Rev Econ Stud*  
50 1998;65(2):261-94.  
51 11 Rosenbaum PR. The role of known effects in observational studies. *Biometrics* 1989;45(2):557-69.  
52 12 Austin PC. An introduction to propensity score methods for reducing the effects of confounding in  
53 observational studies. *Multivar Behav Research* 2011;46(3):399-424.  
54  
55  
56  
57  
58  
59  
60

- 1  
2  
3 13 Dahabreh IJ, Sheldrick RC, Paulus JK, et al. Do observational studies using propensity score  
4 methods agree with randomized trials? A systematic comparison of studies on acute  
5 coronary syndromes. *Eur Heart J* 2012;33(15):1893-901.
- 6 14 Zhang Z, Ni H, Xu X. Observational studies using propensity score analysis underestimated the  
7 effect sizes in critical care medicine. *J Clin Epidemiol* 2014;67(8):932-39.
- 8 15 Li M. Using the Propensity Score Method to Estimate Causal Effects A Review and Practical Guide.  
9 *Organ Res Methods* 2013;16(2):188-226.
- 10 16 Weber J, Polack S, Hartley S. An Online Survey on Identification of Evaluation Capacity, Needs and  
11 Current Practice of Programme Evaluation in Community-based Rehabilitation. *Disability CBR*  
12 *Inclusive Development* 2016;27(2):5-18.
- 13 17 Grandisson M, Hébert M, Thibeault R. A systematic review on how to conduct evaluations in  
14 community-based rehabilitation. *Disabil Rehabil* 2014;36(4):265-75.
- 15 18 Becerril J, Abdulai A. The impact of improved maize varieties on poverty in Mexico: a propensity  
16 score-matching approach. *World Devel* 2010;38(7):1024-35.
- 17 19 Jalan J, Ravallion M. Estimating the benefit incidence of an antipoverty program by propensity-  
18 score matching. *J Bus Econ Stat* 2003;21(1):19-30.
- 19 20 Stuart EA. Matching methods for causal inference: A review and a look forward. *Stat Sci*  
20 2010;25(1):1.
- 21 21 Wu S, Wang R, Zhao Y, et al. The relationship between self-rated health and objective health  
22 status: a population-based study. *BMC Public Health* 2013;13(1):320.
- 23 22 Pollack CE, Chideya S, Cubbin C, et al. Should health studies measure wealth?: a systematic  
24 review. *Am J Prev Med* 2007;33(3):250-64.
- 25 23 Shavers VL. Measurement of socioeconomic status in health disparities research. *J Natl Med Assoc*  
26 2007;99(9):1013.
- 27 24 Cochran WG, Rubin DB. Controlling bias in observational studies: A review. *Sankhya Ser A*  
28 1973;417-46.
- 29 25 Ho DE, Imai K, King G, et al. Matching as nonparametric preprocessing for reducing model  
30 dependence in parametric causal inference. *Polit Anal* 2007;15(3):199-236.
- 31 26 Schafer JL, Kang J. Average causal effects from nonrandomized studies: a practical guide and  
32 simulated example. *Psychol Methods* 2008;13(4):279.
- 33 27 Keele L. An overview of rbounds: An R package for Rosenbaum bounds sensitivity analysis with  
34 matched data. Columbus, OH: White Paper, 2010.
- 35 28 Mauro V, Biggeri M, Deepak S, et al. The effectiveness of community-based rehabilitation  
36 programmes: an impact evaluation of a quasi-randomised trial. *J Epidemiol Community*  
37 *Health* 2014;68(11):1102-08.
- 38 29 Biggeri M, Deepak S, Mauro V, et al. Do community-based rehabilitation programmes promote  
39 the participation of persons with disabilities? A case control study from Mandya District, in  
40 India. *Disabil Rehabil* 2014;36(18):1508-17.
- 41 30 Weber J, Grech S, Polack S. Towards a 'mind map' for evaluative thinking in Community Based  
42 Rehabilitation: reflections and learning. *Disability Global South* 2016;3(2):951-79.
- 43 31 Implementing the vision: Addressing challenges to results-focused management and budgeting.  
44 Implementation Challenges in Results Focused Management and Budgeting; 2002 11-12  
45 February; Paris. OECD.
- 46 32 Taylor P. Social inequality in Vietnam and the challenges to reform. Singapore: Institute of  
47 Southeast Asian Studies 2004:23,212.
- 48  
49  
50  
51  
52  
53  
54  
55  
56  
57  
58  
59  
60

# BMJ Open

## Can propensity score matching be applied to cross-sectional data to evaluate Community-based Rehabilitation? Results of a survey implementing the World Health Organization's Community-based Rehabilitation Indicators in Vietnam

|                                 |                                                                                                                                                                                                                                                                                        |
|---------------------------------|----------------------------------------------------------------------------------------------------------------------------------------------------------------------------------------------------------------------------------------------------------------------------------------|
| Journal:                        | <i>BMJ Open</i>                                                                                                                                                                                                                                                                        |
| Manuscript ID                   | bmjopen-2018-022544.R1                                                                                                                                                                                                                                                                 |
| Article Type:                   | Research                                                                                                                                                                                                                                                                               |
| Date Submitted by the Author:   | 12-Jul-2018                                                                                                                                                                                                                                                                            |
| Complete List of Authors:       | Mason, Catherine; LMU Munich, Department for Medical Information Processing, Biometry and Epidemiology (IBE)<br>Sabariego, Carla; Ludwig-Maximilians University, Public Health and Health Services Research<br>Thắng, Đoàn Mạnh ; Hoa Binh Department of Health<br>Weber, Jörg; CBM eV |
| <b>Primary Subject Heading</b>: | Epidemiology                                                                                                                                                                                                                                                                           |
| Secondary Subject Heading:      | Global health, Public health, Epidemiology                                                                                                                                                                                                                                             |
| Keywords:                       | epidemiological methods, disability, social inequalities                                                                                                                                                                                                                               |
|                                 |                                                                                                                                                                                                                                                                                        |

SCHOLARONE™  
Manuscripts

1  
2  
3  
4  
5  
6  
7  
8  
9  
10  
11  
12  
13  
14  
15  
16  
17  
18  
19  
20  
21  
22  
23  
24  
25  
26  
27  
28  
29  
30  
31  
32  
33  
34  
35  
36  
37  
38  
39  
40  
41  
42  
43  
44  
45  
46  
47  
48  
49  
50  
51  
52  
53  
54  
55  
56  
57  
58  
59  
60

1 Can propensity score matching be applied to cross-sectional data to evaluate Community-  
2 based Rehabilitation? Results of a survey implementing the World Health Organization's  
3 Community-based Rehabilitation Indicators in Vietnam

7 Authors: Catherine Mason<sup>1\*</sup>, Carla Sabariego<sup>1</sup>, Đoàn Mạnh Thắng<sup>2</sup>, Joerg Weber<sup>3</sup>

9 <sup>1</sup> Department for Medical Information Processing, Biometry and Epidemiology (IBE)  
10 Ludwig-Maximilians-Universität München  
11 Marchioninistraße 15  
12 81377 Munich, Germany

14 Catherine.Mason@med.uni-muenchen.de  
15 +49 (0)89 2180-78229

17 <sup>2</sup> Hoa Binh Department of Health (Sở Y tế tỉnh Hòa Bình)  
18 Hoa Binh City, Vietnam

20 <sup>3</sup> CBM International  
21 Bensheim, Germany

24 Keywords: disability, epidemiological methods, social inequalities

26 Word count: 4287

## 1 ABSTRACT

2  
3  
4  
5  
6  
7  
8  
9  
10  
11  
12  
13  
14  
15  
16  
17  
18  
19  
20  
21  
22  
23  
24  
25  
26  
27  
28  
29  
30  
31  
32  
33  
34  
35  
36  
37  
38  
39  
40  
41  
42  
43  
44  
45  
46  
47  
48  
49  
50  
51  
52  
53  
54  
55  
56  
57  
58  
59  
60

**Objectives:** Community-Based Rehabilitation (CBR) is a multi-sectoral approach working to equalize opportunities and include people with disabilities in all aspects of life. The complexity of CBR and often limited resources lead to challenges when attempting to quantify its effectiveness, with randomization and longitudinal data rarely possible. Statistical methods, such as propensity score matching (PSM), offer an alternative approach to evaluate a treatment when randomization is not feasible. The aim of this study is to examine whether PSM can be an effective method to facilitate evaluations of results in CBR when data are cross-sectional.

**Design:** Cross-sectional survey

**Setting and Participants:** Data were collected using the World Health Organization's CBR Indicators in Vietnam, with treatment assignment (participating in CBR or not) determined by province of residence. 298 participants were selected through government records.

**Results:** PSM was conducted using one-to-one nearest neighbour method on ten covariates. Before matching, significant differences between groups were found for six of the ten covariates. PSM successfully adjusted for bias in all covariates in the matched sample (74 matched pairs). A paired t-test compared the outcome of "community inclusion" (a score based on selected indicators) between CBR and non-CBR participants both before and after matching, with CBR participants found to have significantly worse community inclusion scores (mean=17.86, SD=6.30, 95%CI 16.45-19.32) than non-CBR participants (mean=20.93, SD=6.16, 95%CI 19.50-22.35);  $t(73)=3.068$ ,  $p=0.001$ . This result did not differ before and after matching.

**Conclusion:** PSM successfully reduced bias between groups, though its application did not affect the tested outcome. PSM should be considered when analyzing cross-sectional CBR data, especially for international comparisons where differences between populations may be greater.

### Strengths and limitations of this study

- The complexity of CBR and often limited resources available in the field lead to challenges in research attempting to quantify its effectiveness and to a heavy reliance on non-randomized cross-sectional data, implying the need for statistical approaches, such as PSM, to account for these limitations.
- PSM attempts to mimic randomization by creating a sample of participants who received the treatment (CBR participants) that is comparable on all observed covariates to participants who did not receive the treatment (non-CBR participants).
- The potential of using PSM for analyzing cross-sectional CBR data was demonstrated, as biases detected in the distribution of covariates between groups before matching were successfully eliminated.
- One of the main advantages of the CBR Indicators, namely the ability to use comparison individuals without disability from the community is lost; as PSM requires that all participants have a non-zero probability of receiving treatment meaning only people with disabilities can be included.



1  
2  
3  
4  
5  
6  
7  
8  
9  
10  
11  
12  
13  
14  
15  
16  
17  
18  
19  
20  
21  
22  
23  
24  
25  
26  
27  
28  
29  
30  
31  
32  
33  
34  
35  
36  
37  
38  
39  
40  
41  
42  
43  
44  
45  
46  
47  
48  
49  
50  
51  
52  
53  
54  
55  
56  
57  
58  
59  
60

- 1 • PSM only controls for known covariates which means that there is a potential for bias if some
- 2 covariates that affect the outcome are not included.

For peer review only

## 1 INTRODUCTION

2 Community-Based Rehabilitation (CBR) is a multi-sectoral approach working to equalize  
3 opportunities and include people with disabilities in all aspects of community life. It is broadly  
4 defined as “a strategy within general community development for the rehabilitation, equalization of  
5 opportunities and social inclusion of all people with disabilities”[1]. The wide scope of CBR is further  
6 expanded through the various implementing stakeholders involved in CBR, including people with  
7 disabilities themselves, their families and communities, and the relevant governmental and non-  
8 governmental service sectors. It is due, at least in part, to this extensive definition that reliable and  
9 internationally comparable data to monitor and evaluate CBR are scarce. In an effort to synthesize  
10 global perspectives on CBR, the World Health Organization (WHO) developed their “Community-  
11 Based Rehabilitation Guidelines” in 2010 which have since become accepted as a conceptual  
12 framework for CBR[2]. With these guidelines, WHO emphasized the need for a common global  
13 framework for monitoring CBR in line with the Convention on the Rights of Persons with Disability  
14 (CRPD). With the launch of the global WHO CBR Indicators in 2015, there is now a standardized  
15 approach to do this[3,4].

16  
17 The complexity of CBR leads to challenges in research attempting to quantify its effectiveness[5-7].  
18 Fully experimental studies with randomization are rarely possible for both ethical and practical  
19 reasons, which inherently lead to limitations. The possibility of bias arises as the apparent difference  
20 in an outcome between two treatment groups may depend on characteristics that affected whether  
21 or not an individual received a given treatment, instead of being an actual effect of the treatment.  
22 For this reason there has been a recent emphasis on so-called natural experiments, where a range of  
23 primarily statistical approaches are used to evaluate a treatment or intervention when  
24 randomization is not feasible[8]. One such approach is propensity score matching (PSM).

25 PSM was first presented in 1983 by Rosenbaum and Rubin as a method to reduce bias due to  
26 confounding variables in observational studies[9]. It attempts to mimic randomization by creating a  
27 sample of participants who received the treatment that is comparable on all observed covariates to  
28 participants who did not receive the treatment. This effectively creates an experimental dataset  
29 where the comparison group is, on average, equivalent to individuals in the exposed group on all  
30 observed covariates[10-12]. A systematic review comparing 21 PSM studies to 63 RCTs on  
31 therapeutic interventions for acute coronary syndromes found that PSM produced more extreme  
32 treatment effect estimates when compared with those from RCTs, although these differences were  
33 rarely statistically significant[13]. A similar comparison including 20 propensity-score-based studies  
34 matched to RCT results was conducted examining critical care medicine and found that propensity-  
35 score-based studies report less beneficial effects of treatment in comparison to RCTs[14]. Despite  
36 some shortcomings, PSM provides a method for evaluating complex interventions where  
37 randomization is not possible.

38 PSM has been increasingly used in various research fields, including Public Health, to evaluate  
39 complex interventions[15]. CBR is considered a complex intervention, and data collection in the field  
40 is further hindered by low resources making quantitative longitudinal data collection infeasible and  
41 rarely done[6,7,16,17]. This implies that data analysis in the field of CBR relies heavily on cross-  
42 sectional data. PSM has already been successfully applied to cross-sectional data[18,19]. Therefore,  
43 the main objective of this paper is to examine whether PSM can be an effective method to facilitate  
44 evaluations of results in CBR when data are cross-sectional. Data used in the present study were

1 collected using the WHO CBR Indicators in Vietnam in 2016 with the assignment of persons to the  
2 treatment (CBR participants) and non-treatment group (non-CBR participants) determined by  
3 province of residence. PSM will be conducted on the outcome of *community inclusion* of people with  
4 disabilities, the ultimate goal of CBR in strong alignment with the CRPD, using a sum score of WHO  
5 CBR social indicators and an empowerment indicator.

## 6 7 **METHODS**

### 8 **Data Collection**

9 Data collection was conducted using the survey questionnaire accompanying the WHO CBR  
10 Indicators[3]. These indicators examine differences in health, education, social life, livelihood and  
11 empowerment between people with disabilities and other community members. There are two  
12 subsets of indicators: base indicators which are broad and should be used in all data collection  
13 activities to ensure comparability, and supplementary indicators which can provide more specific  
14 coverage, and can be selected depending on the specific CBR goals and strategies of a program. The  
15 indicators and corresponding questions used in this paper are presented in table 1.

16 Data collection involved a multi-site cross-sectional survey in 2016 in two Vietnamese provinces:  
17 Huế, where CBR is fully implemented and all districts have CBR coverage through government  
18 implementation and through non-governmental organizations' (NGO) activities; and Hòa Bình, where  
19 CBR is not implemented by either government or NGOs. The Huế CBR program began in 2009 in  
20 cooperation with the Huế Rehabilitation Hospital. The program focused mainly on activities to  
21 increase capacity building for CBR workers, not only in terms of rehabilitation skills, but also working  
22 to improve their counselling and networking skills. The other focus of the program was to strengthen  
23 referral pathways for people with disabilities so that they could be connected with other existing  
24 services in the province, such as schools with teachers who were trained to support students with  
25 disabilities and vocational training centers. An Android mobile phone application (app), available  
26 from WHO for the CBR Indicators, was used to collect data during interviews (app free to download  
27 at:

28 <http://play.google.com/store/apps/details?id=com.universaltools.whocbrsurvey&hl=en>).

29  
30 People with disabilities were identified prior to the survey by government records. In both provinces  
31 a team of five local health care workers were trained by the lead researcher (CM) over two days on  
32 how to conduct interviews using the survey questions and the app. Data collection was supervised by  
33 CM. Data were collected during face-to-face interviews with data recorded anonymously. All  
34 respondents were informed of the purpose of the study, and then provided verbal (Huế) or written  
35 consent (Hòa Bình). In Huế the decision to provide verbal rather than written consent was justified  
36 since requiring written consent would embarrass illiterate participants, leading to a decreased  
37 willingness to answer further questions truthfully. In instances when the respondent had cognitive  
38 limitations that prevented them from being interviewed, or if the respondent was a minor, a proxy  
39 interview with a family member was performed. Ethical approval was obtained through the Ludwig-  
40 Maximilians-Universität Munich Ethics Commission and by the local provincial Ministries of Health.

### 41 **Variables**

#### 42 *Outcome Variable*

To measure community inclusion, a sum score was created from the social base and supplementary questions, with the addition of the base question from empowerment. These questions all used the same response scale of 1(*Not at all*) to 5(*Completely*) with the final sum score ranging from 4 to 33, with higher scores indicating higher levels of inclusion (Table 1).

**Table 1.** WHO CBR Indicators and questions used to measure them. Base indicators are shown in bold. The response option for all questions ranged from 1 (Not at all) to 5 (Completely).

| Component   | Indicator                                                                                             | Survey Question                                                                                                                              |
|-------------|-------------------------------------------------------------------------------------------------------|----------------------------------------------------------------------------------------------------------------------------------------------|
| Social      | <b>% of people with disability that feel valued as individuals by members of their community</b>      | Do you feel that other people respect you? For example, do you feel that others value you as a person and listen to what you have to say?    |
|             | % of people with disability who make their own decisions about the personal assistance they need      | Do you get to make decisions about the personal assistance that you need (who assists you, what type of assistance, when to get assistance)? |
|             | % of people with disability make their own decisions about their personal relationships               | Do you get to make your own decisions about your personal relationships, such as friends and family?                                         |
|             | % of people with disability who participate in artistic, cultural or religious activities             | Do you get to participate in artistic, cultural or religious activities?                                                                     |
|             | % of people with disability who participate in mainstream recreational, leisure and sports activities | Do you get to participate in community recreational, leisure and sports activities?                                                          |
|             | % of people with disability who know their legal rights                                               | To what extent do you know your legal rights?                                                                                                |
| Empowerment | <b>% of people with disability who make informed choices and decisions</b>                            | Do you get to make the big decisions in your life? For example, deciding who to live with, where to live, or how to spend your money?        |

### Matching Variables

Matching variables were those available from the WHO CBR Indicators, and were selected based on their theoretical association with community inclusion, primarily using CBR Guidelines[2]. Data on *age* and *gender* were collected. Age was collected in categories (0-5, 6-12, 13-17, 18-24, 25-44, 45-64, and 65+) which were dichotomized for the analysis[20]. Though data on disability severity were not available, *general health status* was used as a proxy, using the question “*How would you rate your health today?*”[21]. A variable for *socio-economic status* (SES) was created using a sum score based on the questions “*What is the highest level of education you have achieved or are working to achieve?*” and “*Do you have enough money to meet your needs?*”. The first question is commonly used in SES variable creation, and the second question targets wealth[22,23]. The variable *province of residence* corresponded to CBR coverage (no coverage in Hòa Bình, full CBR coverage in Huế). To account for economic differences between the provinces that might not be captured by SES, the covariate *receiving social protection* (such as for loss of income through old age, sickness or disability) was included. Covariates of *financial awareness* (knowing how to get financial services or social protection if needed), *having access to health services when needed*, and *having access to rehabilitation services when needed* were also included. A proxy for autonomy was captured through the covariates of *being involved in decision making regarding medical treatment* and *participating in a self-help group if desired* (see Supplementary Table). Seeing as the CBR program in Huế focused on increasing referral pathways within the medical and education sectors, the questions derived from the education component and many from the medical component were not included as matching variables, since including covariates associated with CBR participation but not with community inclusion decrease model precision[24].

### 1 *Missing Data*

2 Missing data were low (2.25%). Multiple imputation (five imputations) using fully conditional  
3 specification (MICE package [25] in R Studio Version 0.99.903) was used to replace missing data.  
4

### 5 **Analysis**

#### 6 *Matching on the Propensity Score*

7 The number of treated and untreated participants were similar (difference of n=4). Therefore,  
8 participants were matched using one-to-one nearest neighbour technique, which matched each  
9 treated unit to one control that was closest using calipers of width equal to 0.25 of the standard  
10 deviation (SD) of the logit of the estimated propensity score without iteration[26]. This implies that  
11 for a given treated participant, all the untreated participants are identified whose scores are within  
12 this specified distance and then the best match is formed. If no match falls within this distance the  
13 participant is excluded. Participants were matched on ten covariates (see *Matching Variables*).

#### 14 *Balance Diagnostics*

15 Baseline comparisons between the covariates were conducted before and after matching. Balance  
16 diagnosis was performed using the standardized difference method, which compares the difference  
17 in means of each covariate in units of the pooled standard deviation before and after matching[12].  
18 Successful matching is indicated when the absolute standardized differences of means is less than  
19 0.25[27].

#### 20 *Comparing Groups*

21 For the community inclusion outcome, data matched on the ten covariates were compared using a  
22 paired t-test[28]. Bootstrapping was performed (1000 samples) in order to produce 95% confidence  
23 intervals (CI), which has been shown to account for uncertainty in the matching procedure[20].

24 A sensitivity analysis was performed using the Rosenbaum Bounds for Hodges-Lehmann Point  
25 Estimate to assess how robust the findings were to hidden bias due to unobserved covariates  
26 ('rbounds' package [29] in R Studio Version 0.99.903). The maximum Gamma (the odds of differential  
27 assignment to treatment due to unobserved factors) was set to 2 with increments of 0.1 to test at  
28 which point the between group differences are no longer robust[29].

29 Data cleaning was performed using SPSS version 23 (copyright IBM Corporation). PSM was  
30 performed in R Studio (Version 0.99.903) using the 'MatchIt' package[30].  
31

### 32 **Patient and Public Involvement**

33 Participants were not directly involved in the development of the research question, study design,  
34 recruitment or conduct of the study. However, in the province of Hué (where CBR is implemented)  
35 participants are continually involved in the development of the CBR program, as CBR is participatory  
36 in nature. It was through their motivation – stemming from the need to prove to the national  
37 government and international donors that their intervention has an impact in order to receive funds  
38 – that the survey was conducted in the first place. A study report was submitted to the Hué and Hòa

1 Binh Ministries of Health which presented simple numeric and graphic descriptive findings which  
2 were to be communicated to participants.

#### 4 RESULTS

5 Data were available from 298 participants. In Huế, 575 people with disabilities were identified by  
6 government records and 147 were included, while in Hòa Bình 375 people were identified by  
7 government records and 151 were included (sample size calculated using an alpha significance level  
8 of 0.05 and power of 90%). Included participants were randomly selected from the complete list.  
9 After the random selection, each interviewer was assigned a group of selected participants based on  
10 their geographic location. Of the randomly selected participants, one in Hòa Bình could not be  
11 contacted so another participant was selected. In both provinces none of the invited participants  
12 refused participation. Males comprised 153(51.3%) of the participants, with a modal age group of 45-  
13 64(28.9%) (see table 2 for further descriptives).

14 Before matching CBR participants had higher health status, were more likely to participate in a self-  
15 help group, more financially aware and more likely to be receiving social protection while they had  
16 worse access to rehabilitation services. Some age differences were also noted (Table 2). In the  
17 unmatched sample the absolute standardized difference across the 10 covariates ranged from 0.008  
18 to 1.008 indicating bias.

19 When CBR participants were matched with non-CBR participants on the logit of the specified  
20 propensity score model, 74 matched pairs were formed. This meant that 49.7% of CBR participants  
21 were successfully matched to a control. PSM was successful in reducing bias between the covariates  
22 in the matched sample, as the standardized differences ranged from 0 to 0.147 with all values falling  
23 below the threshold value of 0.25[27] (Table 2).

24 **Table 2.** Baseline characteristics of CBR participants and non-CBR participants in the unmatched and  
25 matched samples. Absolute standardized differences of means are shown, with differences  
26 exceeding the threshold of 0.25 indicated in bold.

| Variable                                 |       | Unmatched Sample          |                             |                       | Matched Sample           |                            |                       |
|------------------------------------------|-------|---------------------------|-----------------------------|-----------------------|--------------------------|----------------------------|-----------------------|
|                                          |       | Mean<br>No CBR<br>(n=151) | Mean<br>With CBR<br>(n=147) | Std. dif. of<br>means | Mean<br>No CBR<br>(n=74) | Mean<br>With CBR<br>(n=74) | Std. dif. of<br>means |
| Age                                      | 0-5   | 11 (7.2%)                 | 6 (4.1%)                    | 0.161                 | 3 (4.1%)                 | 5 (6.8%)                   | 0.136                 |
|                                          | 6-12  | 19 (12.6%)                | 11 (7.5%)                   | 0.193                 | 7 (9.5%)                 | 5 (6.8%)                   | 0.102                 |
|                                          | 13-17 | 4 (2.6%)                  | 6 (4.1%)                    | 0.072                 | 2 (2.7%)                 | 1 (1.4%)                   | 0.068                 |
|                                          | 18-24 | 12 (7.9%)                 | 12 (8.2%)                   | 0.008                 | 7 (9.5%)                 | 7 (9.5%)                   | 0.000                 |
|                                          | 25-44 | 49 (32.5%)                | 32 (21.8%)                  | <b>0.258</b>          | 23 (31.1%)               | 22 (29.7%)                 | 0.033                 |
|                                          | 45-64 | 42 (27.8%)                | 44 (29.9%)                  | 0.046                 | 21 (28.4%)               | 26 (35.1%)                 | 0.147                 |
|                                          | 65+   | 14 (9.3%)                 | 36 (24.5%)                  | <b>0.353</b>          | 11 (14.9%)               | 8 (10.8%)                  | 0.094                 |
| <b>Gender (male)</b>                     |       | 80 (53.0%)                | 73 (50.0%)                  | 0.066                 | 37 (50.0%)               | 42 (56.8%)                 | 0.135                 |
| <b>SES (range 1-10)</b>                  |       | 3.74±1.32                 | 3.91±1.30                   | 0.235                 | 3.65±1.45                | 3.67±1.42                  | 0.020                 |
| <b>Health status (range 1-5)</b>         |       | 2.89±0.77                 | 3.37±0.70                   | <b>0.683</b>          | 3.05±0.75                | 3.14±0.65                  | 0.115                 |
| <b>Receiving social protection</b>       |       | 74 (49.0%)                | 117 (79.6%)                 | <b>1.008</b>          | 48 (64.9%)               | 52 (70.3%)                 | 0.141                 |
| <b>Access to health services</b>         |       | 132 (87.4%)               | 126 (85.7%)                 | 0.048                 | 66 (89.2%)               | 66 (89.2%)                 | 0.000                 |
| <b>Access to rehabilitation services</b> |       | 128 (84.8%)               | 123 (83.7%)                 | <b>0.263</b>          | 29 (39.2%)               | 31 (41.9%)                 | 0.054                 |
| <b>Self-help group</b>                   |       | 63 (41.7%)                | 75 (51.0%)                  | <b>0.396</b>          | 31 (41.9%)               | 32 (43.2%)                 | 0.027                 |
| <b>Financial awareness</b>               |       | 73 (48.3%)                | 122 (83.0%)                 | <b>0.789</b>          | 51 (68.9%)               | 55 (74.3%)                 | 0.134                 |
| <b>Involved in treatment</b>             |       | 47 (31.1%)                | 65 (44.2%)                  | 0.137                 | 65 (87.8%)               | 65 (87.8%)                 | 0.000                 |

| decisions |  |  |  |  |  |  |
|-----------|--|--|--|--|--|--|
|-----------|--|--|--|--|--|--|

1 Note: continuous variables are presented as means  $\pm$  standard deviation; dichotomous variables are presented  
2 as N(%)

3 To test whether PSM affected the pre-defined outcome of community inclusion, the difference  
4 between groups before and after matching were assessed: similar significant differences were found.  
5 In the matched sample, CBR participants had worse community inclusion scores (mean=17.86,  
6 SD=6.30, 95%CI 16.45-19.32) than non-CBR participants (mean=20.93, SD=6.16, 95%CI 19.50-22.35);  
7  $t(73)=3.068$ ,  $p=0.001$ . The sensitivity analysis corroborated the results, showing that CBR participants  
8 had a median difference in community inclusion score 3.5 points lower than non-CBR participants  
9 ( $\text{Gamma}=0$ ). When the Gamma value was increased to 2, the upper and lower bounds did not include  
10 zero indicating robust results[29]. In a further sensitivity analysis, to ensure that the covariate of  
11 "access to rehabilitation" did not bias the model by being more strongly associated with receiving  
12 CBR rather than with the outcome of community inclusion, the model was run excluding this  
13 variable. The new model resulted in 75 matched pairs with all standardized differences falling below  
14 the threshold. The results of the t-test did not differ from the model including access to  
15 rehabilitation; CBR participants had worse community inclusion scores (mean=18.11, SD=5.981,  
16 95%CI 16.72-19.47) than non-CBR participants (mean=21.17, SD=6.381, 95%CI 19.67-22.60);  
17  $t(74)=3.310$ ,  $p=0.0014$ .

18 Overall, the results did not differ from the results before PSM: community inclusion for participants  
19 with CBR (mean=18.61, SD=5.38) and without CBR (mean=20.64, SD=6.49);  $t(296)=2.935$ ,  $p=0.004$   
20 using an independent t-test.

21

## 22 DISCUSSION

23 To our knowledge, this study presents the first use of PSM as a method for analyzing cross-sectional  
24 data in the field of CBR. The study analyzed data collected using the WHO CBR Indicators, and found  
25 that community inclusion scores of CBR participants were significantly lower than those of non-CBR  
26 participants after PSM. Despite bias being detected in the distribution of covariates between groups  
27 before matching, the results before PSM did not significantly differ from those after. We conclude  
28 that PSM can be successfully applied to cross-sectional CBR data, though in this case the bias  
29 reduction provided by PSM did not affect the tested outcome.

30 PSM has been applied only to longitudinal CBR data so far, but PSM studies using cross-sectional data  
31 are available from other fields. These studies had similar results in terms of the methodological  
32 success of PSM, but unlike our study they had final outcomes in line with their hypotheses. One such  
33 example is the study from Jalan and Ravallion which examines the effect of an employment-based  
34 poverty reduction program on income gain, accounting for pre-intervention and foregone  
35 income[19]. Through the trial of three PSM methods, they were able to reduce the differences  
36 between the two populations and to demonstrate the effectiveness of the program. Another such  
37 example is the study from Becerril and Abdulai showing the positive impact of new maize farming  
38 technologies on per capita poverty outcomes[18]. Similarly to our study, they detected bias in the  
39 distribution of covariates between groups before matching, indicating that accounting for bias  
40 though PSM was important. In the field of CBR, PSM has been used to evaluate longitudinal CBR data  
41 in India, looking at livelihood and health outcomes[31,32]. PSM was used to reduce the bias between  
42 the CBR and non-CBR groups, with results showing that CBR participants had better health and

1  
2  
3 1 livelihood outcomes, and that these differences generally increased over time at both four years and  
4 2 seven years. In our study, data was collected seven years after the program began, which would  
5 3 make the timing comparable and it is therefore plausible that the effect of CBR in our study could  
6 4 already be quantifiable. As in our study, these studies all showed bias between groups before  
7 5 matching which were reduced in the matched sample after PSM. However, none of these studies  
8 6 presented their outcome results before matching for comparison, so it cannot be determined if their  
9 7 final results were unaffected by matching as is the case in our study.

11  
12 8 The results of the present study go against the anecdotal evidence that CBR has a positive influence  
13 9 on the lives of people with disabilities[6,7,33]. Results from longitudinal data indicate that CBR has a  
14 10 positive impact on receiving pensions, accessing paid jobs, accessing assistive devices, and personal-  
15 11 practical autonomy, with the impact increasing over time[31]. An explanation for our results could be  
16 12 that cross-sectional data do not allow causal inferences: results could simply point out that the  
17 13 province with highest problems has been selected for receiving CBR interventions. While the cross-  
18 14 sectional data collected in this study represent the first quantitative data from the region and  
19 15 therefore an important foundation for future work, the results emphasizes the general need for  
20 16 further collection and publication of CBR data, especially longitudinal data. Additionally, this study  
21 17 focused on community inclusion - the ultimate goal of CBR - but when interpreting results it is also  
22 18 important to consider the specific targets of the program being examined. Though CBR aims to  
23 19 impact all aspects of the lives of people with disabilities to increase community inclusion, the  
24 20 program in Hué does not directly target community inclusion. The program focuses on increasing the  
25 21 capacity of CBR workers and on strengthening referral pathways with the medical and educational  
26 22 sectors. Through these activities the community inclusion of people with disabilities should improve  
27 23 over time, but since community inclusion was not the direct target of the program, the community  
28 24 inclusion effects might only appear after a longer period, which could be a reason for the counter-  
29 25 intuitive results. Therefore, when assessing a program in its early stages, it may be more important to  
30 26 match the indicators used with the specific targets of programs.

31  
32  
33  
34  
35  
36 27 To our knowledge, this study is the first to implement the recently developed WHO CRB  
37 28 Indicators[4]. The study highlights how important it is to collect standardized data in the field of CBR  
38 29 in order to facilitate comparisons between groups and determine effectiveness of programs. One of  
39 30 the main advantages of the CBR Indicators and their data collection strategy is that they are easy to  
40 31 use in the field. The indicators allow for descriptive comparisons to be made easily, but for indicators  
41 32 to be used appropriately it is important to go beyond these descriptive results using inferential  
42 33 statistics. Furthermore, no single indicator or even a set of indicators is capable of capturing all  
43 34 changes in dynamic settings. The use of indicators alone has the potential limitation of collecting  
44 35 meaningless or misleading information,[34] and therefore they should be used as part of a broad  
45 36 evaluation strategy, in combination with qualitative and participatory evaluations[33]. Another way  
46 37 to reduce the limitations arising from indicator use is to continually test and re-assess the  
47 38 indicators[34]. In the case of the CBR Indicators, a priority should be to do this in partnership with  
48 39 communities and people with disabilities in order to promote their uptake.

49  
50  
51  
52 40 The use of PSM as a method for analysis of cross-sectional data collected from the CBR Indicators is  
53 41 conceptually strong, due to its ability to reduce bias due to confounding variables in observational  
54 42 studies[9]. However, the methodological limitations of PSM also need to be considered. PSM  
55 43 requires that each participant has a non-zero probability of receiving treatment, meaning only  
56 44 people with disabilities can be included in the analysis. Due to this, one of the main advantages of



1 the CBR Indicators, namely the ability to use comparison individuals from the community, is lost[4].  
2 Furthermore, PSM only controls for known covariates which means that there is a potential for bias if  
3 some covariates that affect the outcome are not included[9]. For example, in this study no data were  
4 available on the ethnicity of participants, despite its known association with social disparities in  
5 Vietnam[35]. Another such covariate in this study could be disability severity, although this was  
6 partially adjusted for in both the participant selection, whereby all people with disabilities were  
7 identified using the same government disability criteria, and further in the analysis through the  
8 inclusion of the self-rated health covariate. Another limitation of PSM is that it leads to reduced  
9 sample size which could limit generalizability, though this is partly addressed through the provided  
10 sensitivity analysis. The reduced sample size also increases the risk of type II error[36], but the  
11 sample size of this study met the commonly recommended minimum sample size of  $10(p + 1)$ , where  
12  $p$  is the number of matching variables[37]. This study presents a starting point to encourage the  
13 generation of quantitative CBR research and demonstrates one possible method for reducing bias  
14 when analyzing cross-sectional CBR data. Further studies should look into additional statistical  
15 methods for analyzing the results obtained from the CBR Indicators.

16 Based on the present study, we recommend the further use and testing of the WHO CBR Indicators  
17 to increase standardized data collection in the field of CBR. In accompaniment to increased data  
18 collection, we recommend PSM as a method to reduce bias in cross-sectional CBR data analyses,  
19 especially for international comparisons where differences between populations may be greater than  
20 the within country differences observed in this study. Since using cross-sectional data presents  
21 limitations even after adjusting for bias, we also emphasize the need for future longitudinal data  
22 collection in order to assess effectiveness in the field of CBR.

## 23 **CONCLUSION**

24 This study presents the first use of PSM as a method for analyzing cross-sectional CBR data. While  
25 randomized and longitudinal data are ideal for evaluations, cross-sectional data presents the  
26 advantage of being more feasible to collect and thereby providing an essential foundation to  
27 generate hypotheses and perform further studies. Therefore, it is essential that appropriate  
28 statistical methods are applied to capitalize on available data. The potential of using PSM for  
29 analyzing cross-sectional CBR data was demonstrated, though further research should investigate  
30 alternative inferential methods, such as cluster matching or adjusted regression, which may be more  
31 suitable in allowing for the comparison of the differences between persons with and without  
32 disabilities in line with the WHO CBR Indicators. We recommend that the questions and indicators be  
33 continually reviewed, and that future cross-sectional CBR studies use PSM to reduce bias when  
34 comparing groups.

35

## 36 **FUNDING**

37 This research received no specific grant from any funding agency in the public, commercial or not-  
38 for-profit sectors.

## 39 **COMPETING INTERESTS**

40 The authors declare no competing interests.

## 1 DATA SHARING

2 The data are owned by the World Health Organization (WHO). Data are available from the WHO for  
3 researchers who meet the criteria for access to confidential data. Interested researchers can access  
4 the data by the same means the authors accessed them, by contacting WHO under  
5 [disability@who.int](mailto:disability@who.int). Statistical code is available from the corresponding author.

## 6 ACKNOWLEDGEMENTS

7 The authors express gratitude to those from the Vietnamese Ministries and the local healthcare  
8 workers who lent their knowledge and field experience. Special thanks go out to the interviewers  
9 who took the time to visit and speak with the participants; in Huế: Nguyen Thi Phung Diem, Nguyen  
10 Van Hong, Thuong Thi Huong Giang, Thian Cong Chirh, and Nguyen Thi Ngoc Anh and in Hoa Binh: Ha  
11 Thi Thoan, Vu Dury Hieu, Le Tleaal Hoa, Nguyen Quoc Dung, Le Vai Huy, and Nguyen Thanh.

## 12 AUTHOR CONTRIBUTIONS

13 Conceptualization: CM JW CS  
14 Investigation: CM JW  
15 Methodology: CM JW CS  
16 Data curation: CM DMT  
17 Formal analysis: CM  
18 Project administration: CM JW CS  
19 Resources: CM JW CS DMT  
20 Supervision: CM DMT CS JW  
21 Writing – original draft: CM CS JW  
22 Writing – review & editing: CM JW CS DMT

## 24 REFERENCES

- 25 1 International Labour Organization, United Nations Educational, Scientific and Cultural Organization  
26 and the World Health Organization. CBR: A strategy for rehabilitation, equalization of  
27 opportunities, poverty reduction and social inclusion of people with disabilities: joint position  
28 paper. Geneva: World Health Organization, 2004.
- 29 2 World Health Organization, United Nations Educational, Scientific and Cultural Organization, &  
30 International Labour Organization. Community-based rehabilitation: CBR Guidelines. Geneva:  
31 World Health Organization, 2010.
- 32 3 World Health Organization, International Disability and Development Consortium. Capturing the  
33 difference we make- Community-based rehabilitation indicators manual. Geneva: World  
34 Health Organization, 2015.
- 35 4 Mason C, Weber J, Atasoy S, et al. Development of indicators for monitoring Community-Based  
36 Rehabilitation. *PLoS One* 2017;12(6):e0178418.
- 37 5 Finkenflügel H, Wolffers I, Huijsman R. The evidence base for community-based rehabilitation: a  
38 literature review. *Int J Rehabil Res* 2005;28(3):187-201.
- 39 6 Cornielje H, Velema JP, Finkenflugel H. Community based rehabilitation programmes: Monitoring  
40 and evaluation in order to measure results. *Lepr Rev* 2008;79(1):36-49.
- 41 7 Lemmi V, Blanchet K, Gibson LJ, et al. Community-based rehabilitation for people with physical and  
42 mental disabilities in low- and middle-income countries: a systematic review and meta-  
43 analysis. *Campbell Sys Rev* 2015;11(15).

- 1  
2  
3 1 8 Craig P, Cooper C, Gunnell D, et al. Using natural experiments to evaluate population health  
4 2 interventions: new Medical Research Council guidance. *J Epidemiol Community Health*  
5 3 2012;jech-2011-200375.  
6 4 9 Rosenbaum PR, Rubin DB. The central role of the propensity score in observational studies for  
7 5 causal effects. *Biometrika* 1983;70(1):41-55.  
8 6 10 Heckman JJ, Ichimura H, Todd P. Matching as an econometric evaluation estimator. *Rev Econ Stud*  
9 7 1998;65(2):261-94.  
10 8 11 Rosenbaum PR. The role of known effects in observational studies. *Biometrics* 1989;45(2):557-69.  
11 9 12 Austin PC. An introduction to propensity score methods for reducing the effects of confounding in  
12 10 observational studies. *Multivar Behav Research* 2011;46(3):399-424.  
13 11 13 Dahabreh IJ, Sheldrick RC, Paulus JK, et al. Do observational studies using propensity score  
14 12 methods agree with randomized trials? A systematic comparison of studies on acute  
15 13 coronary syndromes. *Eur Heart J* 2012;33(15):1893-901.  
16 14 14 Zhang Z, Ni H, Xu X. Observational studies using propensity score analysis underestimated the  
17 15 effect sizes in critical care medicine. *J Clin Epidemiol* 2014;67(8):932-39.  
18 16 15 Li M. Using the Propensity Score Method to Estimate Causal Effects A Review and Practical Guide.  
19 17 *Organ Res Methods* 2013;16(2):188-226.  
20 18 16 Weber J, Polack S, Hartley S. An Online Survey on Identification of Evaluation Capacity, Needs and  
21 19 Current Practice of Programme Evaluation in Community-based Rehabilitation. *Disability CBR*  
22 20 *Inclusive Development* 2016;27(2):5-18.  
23 21 17 Grandisson M, Hébert M, Thibeault R. A systematic review on how to conduct evaluations in  
24 22 community-based rehabilitation. *Disabil Rehabil* 2014;36(4):265-75.  
25 23 18 Becerril J, Abdulai A. The impact of improved maize varieties on poverty in Mexico: a propensity  
26 24 score-matching approach. *World Devel* 2010;38(7):1024-35.  
27 25 19 Jalan J, Ravallion M. Estimating the benefit incidence of an antipoverty program by propensity-  
28 26 score matching. *J Bus Econ Stat* 2003;21(1):19-30.  
29 27 20 Stuart EA. Matching methods for causal inference: A review and a look forward. *Stat Sci*  
30 28 2010;25(1):1.  
31 29 21 Wu S, Wang R, Zhao Y, et al. The relationship between self-rated health and objective health  
32 30 status: a population-based study. *BMC Public Health* 2013;13(1):320.  
33 31 22 Pollack CE, Chideya S, Cubbin C, et al. Should health studies measure wealth?: a systematic  
34 32 review. *Am J Prev Med* 2007;33(3):250-64.  
35 33 23 Shavers VL. Measurement of socioeconomic status in health disparities research. *J Natl Med Assoc*  
36 34 2007;99(9):1013.  
37 35 24 Garrido M, Kelley A, Parisc J, Roza K, Meier D, Morrison R, Aldridge M. (2014). Methods for  
38 36 constructing and assessing propensity scores. *Health Serv Res* 2014;49(5):1701-1720.  
39 37 25 Stef van Buuren, Karin Groothuis-Oudshoorn). mice: Multivariate Imputation by Chained  
40 38 Equations in R. *J Stat Softw* 2011; 45(3):1-67. URL <http://www.jstatsoft.org/v45/i03/>.  
41 39 26 Cochran WG, Rubin DB. Controlling bias in observational studies: A review. *Sankhya Ser A*  
42 40 1973;417-46.  
43 41 27 Ho DE, Imai K, King G, et al. Matching as nonparametric preprocessing for reducing model  
44 42 dependence in parametric causal inference. *Polit Anal* 2007;15(3):199-236.  
45 43 28 Austin, Peter C. A critical appraisal of propensity-score matching in the medical literature between  
46 44 1996 and 2003. *Stat Med* 2008;27.12: 2037-2049.  
47 45 29 Keele L. An overview of rbounds: An R package for Rosenbaum bounds sensitivity analysis with  
48 46 matched data. R package version 2.1. <https://CRAN.R-project.org/package=rbounds> r, 2010.  
49 47 30 Ho DE, Imai K, King G, Stuart EA. MatchIt: Nonparametric Preprocessing for Parametric Causal  
50 48 Inference. *J Stat Softw* 2011. 42(8):1-28. URL <http://www.jstatsoft.org/v42/i08/>.  
51 49 31 Mauro V, Biggeri M, Deepak S, et al. The effectiveness of community-based rehabilitation  
52 50 programmes: an impact evaluation of a quasi-randomised trial. *J Epidemiol Community*  
53 51 *Health* 2014;68(11):1102-08.

- 1  
2  
3 1 32 Biggeri M, Deepak S, Mauro V, et al. Do community-based rehabilitation programmes promote  
4 2 the participation of persons with disabilities? A case control study from Mandya District, in  
5 3 India. *Disabil Rehabil* 2014;36(18):1508-17.  
6 4 33 Weber J, Grech S, Polack S. Towards a 'mind map' for evaluative thinking in Community Based  
7 5 Rehabilitation: reflections and learning. *Disability Global South* 2016;3(2):951-79.  
8 6 34 Implementing the vision: Addressing challenges to results-focused management and budgeting.  
9 7 Implementation Challenges in Results Focused Management and Budgeting; 2002 11-12  
10 8 February; Paris. OECD.  
11 9 35 Taylor P. Social inequality in Vietnam and the challenges to reform. Singapore: Institute of  
12 10 Southeast Asian Studies 2004:23,212.  
13 11 36 Streiner, DL, Norman, GR. The pros and cons of propensity scores. *Chest* 2012;142(6):1380-1382.  
14 12 37 Tumlinson, SE, Sass, DA, Cano, SM. The search for causal inferences: Using propensity scores post  
15 13 hoc to reduce estimation error with nonexperimental research. *J Pediatr Psychol*  
16 14 2014;39(2):246-257.  
17  
18  
19  
20  
21  
22  
23  
24  
25  
26  
27  
28  
29  
30  
31  
32  
33  
34  
35  
36  
37  
38  
39  
40  
41  
42  
43  
44  
45  
46  
47  
48  
49  
50  
51  
52  
53  
54  
55  
56  
57  
58  
59  
60

Or peer review only

**Supplementary Table.** The WHO CBR Survey questions, response options and analysis categories for the matching variables.

| Variable                                | Survey Question and Response Options                                                                                                                                                                                                                                                                                                                                                                                       | Analysis Categories                                                                                                                                                 |
|-----------------------------------------|----------------------------------------------------------------------------------------------------------------------------------------------------------------------------------------------------------------------------------------------------------------------------------------------------------------------------------------------------------------------------------------------------------------------------|---------------------------------------------------------------------------------------------------------------------------------------------------------------------|
| Gender                                  | Record the gender of the selected participant                                                                                                                                                                                                                                                                                                                                                                              | Male=1, Female=0                                                                                                                                                    |
| Age                                     | How old are you?                                                                                                                                                                                                                                                                                                                                                                                                           | 0-5yrs=1; 6-12yrs=2; 13-17yrs=3; 18-24yrs=4; 25-44yrs=5; 45-64yrs=6; 65+yrs=7                                                                                       |
| Education Level (for creation of SES)   | What is the highest level of education you have achieved, or are working to achieve?<br><i>1=No schooling or never completed any grade; 2=Elementary education; 3=Vocational education; 4=Professional training; 5=Secondary school; 6=College; 7=University; 8=Post-graduate studies; 9=Other</i>                                                                                                                         | If respondent answered 1: score=0<br>If respondent answered 2: score=1<br>If respondent answered 3,4,5: score=2*<br>If respondent answered 6,7,8: score=3           |
| Employment Grade                        | What is your current working situation?<br><i>1=Not working and looking for work; 2=Not working for wages and not looking for paid work; 3=Working for wages or salary with an employer; 4=Working for wages, but currently on sick leave; 5=Self-employed or own-account worker; 6=Working as unpaid family member; 7=Retired because of the health condition; 8=Retired because of age; 9=Early retirement; 10=Other</i> | If respondent answered 1: score=0<br>If respondent answered 6: score=1<br>If respondent answered 2,3,4,5,7,8,9: score=2<br>If respondent answered 10: score=missing |
| Health Status (for creation of SES)     | In general, how would you rate your health today?<br><i>1 = Very good; 2 = Good; 3 = Neither poor nor good; 4 = Poor; 5 = Very poor</i>                                                                                                                                                                                                                                                                                    | Inverted                                                                                                                                                            |
| Received needed medical care            | In the last 12 months, has there been a time when you needed health care but did not get that care?<br><i>1 = Yes; 2 = No; 3 = No need for health care in the past 12 months</i>                                                                                                                                                                                                                                           | If respondent answered 1: score=0<br>If respondent answered 2 or 3: score=1                                                                                         |
| Involved in making treatment decisions  | On your last visit to a health care provider, to what extent were you involved in making decisions for your treatment?<br><i>1 (Not at all); 2; 3; 4; 5 (Completely)</i>                                                                                                                                                                                                                                                   | No transformation                                                                                                                                                   |
| Received needed rehabilitation services | In the last 12 months, has there been a time when you needed rehabilitation services, such as physical, occupational, or speech therapy, but did not get those services?<br><i>1 = Yes; 2 = No; 3 = No need for rehabilitation services in the past 12 months</i>                                                                                                                                                          | If respondent answered 1: score=0<br>If respondent answered 2 or 3: score=1                                                                                         |
| Aware of financial services             | Do you know how to get financial services such as credit, insurance, grants, and savings programs?<br><i>1 = Yes; 2 = No</i>                                                                                                                                                                                                                                                                                               | If respondent answered 1: score=1<br>If respondent answered 2: score=0                                                                                              |
| Receive social protection               | Do you currently benefit from any social protection program, such as loss of income through old age, sickness or disability?<br><i>1 = Yes; 2 = No</i>                                                                                                                                                                                                                                                                     | If respondent answered 1: score=1<br>If respondent answered 2: score=0                                                                                              |
| Participation in self-help group        | Are you a member of a self-help group?<br><i>1=Yes; 2=No, but I would like to; 3=No, I don't want to</i>                                                                                                                                                                                                                                                                                                                   | If respondent answered 1 or 3: score=1<br>If respondent answered 2: score=0                                                                                         |

## STROBE Statement—checklist of items that should be included in reports of observational studies

|                              | Item No | Recommendation                                                                                                                                                                                                                                                                                                                                                                                                                                                                                                                                                                                                                                                                                                        |
|------------------------------|---------|-----------------------------------------------------------------------------------------------------------------------------------------------------------------------------------------------------------------------------------------------------------------------------------------------------------------------------------------------------------------------------------------------------------------------------------------------------------------------------------------------------------------------------------------------------------------------------------------------------------------------------------------------------------------------------------------------------------------------|
| <b>Title and abstract</b>    | 1       | (a) Indicate the study's design with a commonly used term in the title or the abstract<br>Pg 1, 1-3<br>(b) Provide in the abstract an informative and balanced summary of what was done and what was found<br>Pg 2, 3-28                                                                                                                                                                                                                                                                                                                                                                                                                                                                                              |
| <b>Introduction</b>          |         |                                                                                                                                                                                                                                                                                                                                                                                                                                                                                                                                                                                                                                                                                                                       |
| Background/rationale         | 2       | Explain the scientific background and rationale for the investigation being reported<br>Pg 4, 2-39                                                                                                                                                                                                                                                                                                                                                                                                                                                                                                                                                                                                                    |
| Objectives                   | 3       | State specific objectives, including any prespecified hypotheses<br>Pg 4, 40- pg 5, 3                                                                                                                                                                                                                                                                                                                                                                                                                                                                                                                                                                                                                                 |
| <b>Methods</b>               |         |                                                                                                                                                                                                                                                                                                                                                                                                                                                                                                                                                                                                                                                                                                                       |
| Study design                 | 4       | Present key elements of study design early in the paper<br>Pg 5, 7-8; 14                                                                                                                                                                                                                                                                                                                                                                                                                                                                                                                                                                                                                                              |
| Setting                      | 5       | Describe the setting, locations, and relevant dates, including periods of recruitment, exposure, follow-up, and data collection<br>Pg 5, 14-37                                                                                                                                                                                                                                                                                                                                                                                                                                                                                                                                                                        |
| Participants                 | 6       | (a) <i>Cohort study</i> —Give the eligibility criteria, and the sources and methods of selection of participants. Describe methods of follow-up<br><i>Case-control study</i> —Give the eligibility criteria, and the sources and methods of case ascertainment and control selection. Give the rationale for the choice of cases and controls<br><i>Cross-sectional study</i> —Give the eligibility criteria, and the sources and methods of selection of participants<br>Pg 5, 27; pg 8, 5<br>(b) <i>Cohort study</i> —For matched studies, give matching criteria and number of exposed and unexposed<br><i>Case-control study</i> —For matched studies, give matching criteria and the number of controls per case |
| Variables                    | 7       | Clearly define all outcomes, exposures, predictors, potential confounders, and effect modifiers. Give diagnostic criteria, if applicable<br>Pg 5, 40- pg 6, 23; Supplementary Table                                                                                                                                                                                                                                                                                                                                                                                                                                                                                                                                   |
| Data sources/<br>measurement | 8*      | For each variable of interest, give sources of data and details of methods of assessment (measurement). Describe comparability of assessment methods if there is more than one group<br>Pg 5, 7-13                                                                                                                                                                                                                                                                                                                                                                                                                                                                                                                    |
| Bias                         | 9       | Describe any efforts to address potential sources of bias<br>Pg 7, 20-27 → The analysis uses PSM, a method to reduce bias                                                                                                                                                                                                                                                                                                                                                                                                                                                                                                                                                                                             |
| Study size                   | 10      | Explain how the study size was arrived at<br>Pg 8, 2-5                                                                                                                                                                                                                                                                                                                                                                                                                                                                                                                                                                                                                                                                |
| Quantitative variables       | 11      | Explain how quantitative variables were handled in the analyses. If applicable, describe which groupings were chosen and why<br>Pg 5, 40- pg 6, 23; Supplementary Table                                                                                                                                                                                                                                                                                                                                                                                                                                                                                                                                               |
| Statistical methods          | 12      | (a) Describe all statistical methods, including those used to control for confounding                                                                                                                                                                                                                                                                                                                                                                                                                                                                                                                                                                                                                                 |

1  
2 Pg 6, 6-29

3 (b) Describe any methods used to examine subgroups and interactions

4 (c) Explain how missing data were addressed

5 Pg 7, 1-2

6 (d) *Cohort study*—If applicable, explain how loss to follow-up was addressed

7 *Case-control study*—If applicable, explain how matching of cases and controls was  
8 addressed

9 *Cross-sectional study*—If applicable, describe analytical methods taking account of  
10 sampling strategy

11 (e) Describe any sensitivity analyses

12 Pg 7, 23-27; pg 9, 8-14

13  
14  
15 Continued on next page

16  
17  
18  
19  
20  
21  
22  
23  
24  
25  
26  
27  
28  
29  
30  
31  
32  
33  
34  
35  
36  
37  
38  
39  
40  
41  
42  
43  
44  
45  
46  
47  
48  
49  
50  
51  
52  
53  
54  
55  
56  
57  
58  
59  
60

For peer review only

**Results**

|                          |     |                                                                                                                                                                                                                                                                                                                                                                                                                            |
|--------------------------|-----|----------------------------------------------------------------------------------------------------------------------------------------------------------------------------------------------------------------------------------------------------------------------------------------------------------------------------------------------------------------------------------------------------------------------------|
| Participants             | 13* | (a) Report numbers of individuals at each stage of study—eg numbers potentially eligible, examined for eligibility, confirmed eligible, included in the study, completing follow-up, and analysed<br>Pg 8, 2-4<br>(b) Give reasons for non-participation at each stage<br>Pg 8, 7-8<br>(c) Consider use of a flow diagram                                                                                                  |
| Descriptive data         | 14* | (a) Give characteristics of study participants (eg demographic, clinical, social) and information on exposures and potential confounders<br>Pg 8, 9-10, 21-25<br>(b) Indicate number of participants with missing data for each variable of interest<br>Pg 7, 1-2<br>(c) <i>Cohort study</i> —Summarise follow-up time (eg, average and total amount)                                                                      |
| Outcome data             | 15* | <i>Cohort study</i> —Report numbers of outcome events or summary measures over time<br><i>Case-control study</i> —Report numbers in each exposure category, or summary measures of exposure<br><i>Cross-sectional study</i> —Report numbers of outcome events or summary measures<br>Pg 5, 40- pg 6, 2                                                                                                                     |
| Main results             | 16  | (a) Give unadjusted estimates and, if applicable, confounder-adjusted estimates and their precision (eg, 95% confidence interval). Make clear which confounders were adjusted for and why they were included<br>Pg 9, 1-5<br>(b) Report category boundaries when continuous variables were categorized<br>(c) If relevant, consider translating estimates of relative risk into absolute risk for a meaningful time period |
| Other analyses           | 17  | Report other analyses done—eg analyses of subgroups and interactions, and sensitivity analyses<br>Pg 9, 5-14                                                                                                                                                                                                                                                                                                               |
| <b>Discussion</b>        |     |                                                                                                                                                                                                                                                                                                                                                                                                                            |
| Key results              | 18  | Summarise key results with reference to study objectives<br>Pg 9, 20-26                                                                                                                                                                                                                                                                                                                                                    |
| Limitations              | 19  | Discuss limitations of the study, taking into account sources of potential bias or imprecision. Discuss both direction and magnitude of any potential bias<br>Pg 10, 7-22; 29-33; pg 10, 38- pg 11, 1-7                                                                                                                                                                                                                    |
| Interpretation           | 20  | Give a cautious overall interpretation of results considering objectives, limitations, multiplicity of analyses, results from similar studies, and other relevant evidence<br>Pg 11, 8-18                                                                                                                                                                                                                                  |
| Generalisability         | 21  | Discuss the generalisability (external validity) of the study results<br>Pg 11, 4-6                                                                                                                                                                                                                                                                                                                                        |
| <b>Other information</b> |     |                                                                                                                                                                                                                                                                                                                                                                                                                            |
| Funding                  | 22  | Give the source of funding and the role of the funders for the present study and, if applicable, for the original study on which the present article is based<br>Pg 11, 32-33                                                                                                                                                                                                                                              |



1  
2 \*Give information separately for cases and controls in case-control studies and, if applicable, for exposed and  
3 unexposed groups in cohort and cross-sectional studies.  
4

5 **Note:** An Explanation and Elaboration article discusses each checklist item and gives methodological background and  
6 published examples of transparent reporting. The STROBE checklist is best used in conjunction with this article (freely  
7 available on the Web sites of PLoS Medicine at <http://www.plosmedicine.org/>, Annals of Internal Medicine at  
8 <http://www.annals.org/>, and Epidemiology at <http://www.epidem.com/>). Information on the STROBE Initiative is  
9 available at [www.strobe-statement.org](http://www.strobe-statement.org).  
10  
11  
12  
13  
14  
15  
16  
17  
18  
19  
20  
21  
22  
23  
24  
25  
26  
27  
28  
29  
30  
31  
32  
33  
34  
35  
36  
37  
38  
39  
40  
41  
42  
43  
44  
45  
46  
47  
48  
49  
50  
51  
52  
53  
54  
55  
56  
57  
58  
59  
60

# BMJ Open

## Can propensity score matching be applied to cross-sectional data to evaluate Community-based Rehabilitation? Results of a survey implementing the World Health Organization's Community-based Rehabilitation Indicators in Vietnam

|                                 |                                                                                                                                                                                                                                                                                        |
|---------------------------------|----------------------------------------------------------------------------------------------------------------------------------------------------------------------------------------------------------------------------------------------------------------------------------------|
| Journal:                        | <i>BMJ Open</i>                                                                                                                                                                                                                                                                        |
| Manuscript ID                   | bmjopen-2018-022544.R2                                                                                                                                                                                                                                                                 |
| Article Type:                   | Research                                                                                                                                                                                                                                                                               |
| Date Submitted by the Author:   | 07-Nov-2018                                                                                                                                                                                                                                                                            |
| Complete List of Authors:       | Mason, Catherine; LMU Munich, Department for Medical Information Processing, Biometry and Epidemiology (IBE)<br>Sabariego, Carla; Ludwig-Maximilians University, Public Health and Health Services Research<br>Thắng, Đoàn Mạnh ; Hoa Binh Department of Health<br>Weber, Jörg; CBM eV |
| <b>Primary Subject Heading</b>: | Epidemiology                                                                                                                                                                                                                                                                           |
| Secondary Subject Heading:      | Global health, Public health, Epidemiology                                                                                                                                                                                                                                             |
| Keywords:                       | epidemiological methods, disability, social inequalities                                                                                                                                                                                                                               |
|                                 |                                                                                                                                                                                                                                                                                        |

SCHOLARONE™  
Manuscripts

1  
2  
3 1 Can propensity score matching be applied to cross-sectional data to evaluate Community-  
4 2 based Rehabilitation? Results of a survey implementing the World Health Organization's  
5 3 Community-based Rehabilitation Indicators in Vietnam  
6 4  
7 5  
8 6  
9 7

10 8  
11 9 Authors: Catherine Mason<sup>1\*</sup>, Carla Sabariego<sup>1</sup>, Đoàn Mạnh Thắng<sup>2</sup>, Joerg Weber<sup>3</sup>  
12 10  
13 11

14 12 <sup>1</sup> Department for Medical Information Processing, Biometry and Epidemiology (IBE)  
15 13 Ludwig-Maximilians-Universität München  
16 14 Marchioninistraße 15  
17 15 81377 Munich, Germany  
18 16  
19 17

20 18 Catherine.Mason@med.uni-muenchen.de  
21 19 +49 (0)89 2180-78229  
22 20  
23 21

24 22 <sup>2</sup> Hoa Binh Department of Health (Sở Y tế tỉnh Hòa Bình)  
25 23 Hoa Binh City, Vietnam  
26 24  
27 25

28 26 <sup>3</sup> CBM International  
29 27 Bensheim, Germany  
30 28  
31 29

32 30  
33 31 Keywords: disability, epidemiological methods, social inequalities  
34 32  
35 33

36 34 Word count: 3787  
37 35  
38 36  
39 37  
40 38  
41 39  
42 40  
43 41  
44 42  
45 43  
46 44  
47 45  
48 46  
49 47  
50 48  
51 49  
52 50  
53 51  
54 52  
55 53  
56 54  
57 55  
58 56  
59 57  
60 58

## 1 ABSTRACT

2  
3  
4  
5  
6  
7  
8  
9  
10  
11  
12  
13  
14  
15  
16  
17  
18  
19  
20  
21  
22  
23  
24  
25  
26  
27  
28  
29  
30  
31  
32  
33  
34  
35  
36  
37  
38  
39  
40  
41  
42  
43  
44  
45  
46  
47  
48  
49  
50  
51  
52  
53  
54  
55  
56  
57  
58  
59  
60

1 **Objectives:** Community-Based Rehabilitation (CBR) is a multi-sectoral approach working to equalize opportunities and include people with disabilities in all aspects of life. The complexity of CBR and often limited resources lead to challenges when attempting to quantify its effectiveness, with randomization and longitudinal data rarely possible. Statistical methods, such as propensity score matching (PSM), offer an alternative approach to evaluate a treatment when randomization is not feasible. The aim of this study is to examine whether PSM can be an effective method to facilitate evaluations of results in CBR when data are cross-sectional.

11 **Design:** Cross-sectional survey

13 **Setting and Participants:** Data were collected using the World Health Organization's CBR Indicators in Vietnam, with treatment assignment (participating in CBR or not) determined by province of residence. 298 participants were selected through government records.

17 **Results:** PSM was conducted using one-to-one nearest neighbour method on ten covariates. In the unmatched sample, significant differences between groups were found for six of the ten covariates. PSM successfully adjusted for bias in all covariates in the matched sample (74 matched pairs). A paired t-test compared the outcome of "community inclusion" (a score based on selected indicators) between CBR and non-CBR participants for both the matched and unmatched samples, with CBR participants found to have significantly worse community inclusion scores (mean=17.86, SD=6.30, 95%CI 16.45-19.32) than non-CBR participants (mean=20.93, SD=6.16, 95%CI 19.50-22.35);  $t(73)=3.068$ ,  $p=0.001$ . This result did not differ between the matched and unmatched samples.

26 **Conclusion:** PSM successfully reduced bias between groups, though its application did not affect the tested outcome. PSM should be considered when analyzing cross-sectional CBR data, especially for international comparisons where differences between populations may be greater.

### 30 **Strengths and limitations of this study**

- 31 • The complexity of CBR and often limited resources available in the field lead to challenges in research attempting to quantify its effectiveness and to a heavy reliance on non-randomized cross-sectional data, implying the need for statistical approaches, such as PSM, to account for these limitations.
- 32 • PSM attempts to mimic randomization by creating a sample of participants who received the treatment (CBR participants) that is comparable on all observed covariates to participants who did not receive the treatment (non-CBR participants).
- 33 • The potential of using PSM for analyzing cross-sectional CBR data was demonstrated, as biases detected in the distribution of covariates between groups in the unmatched sample were successfully eliminated.
- 34 • One of the main advantages of the CBR Indicators, namely the ability to use comparison individuals without disability from the community is lost; as PSM requires that all participants have a non-zero probability of receiving treatment meaning only people with disabilities can be included.

1  
2  
3  
4  
5  
6  
7  
8  
9  
10  
11  
12  
13  
14  
15  
16  
17  
18  
19  
20  
21  
22  
23  
24  
25  
26  
27  
28  
29  
30  
31  
32  
33  
34  
35  
36  
37  
38  
39  
40  
41  
42  
43  
44  
45  
46  
47  
48  
49  
50  
51  
52  
53  
54  
55  
56  
57  
58  
59  
60

- 1 • PSM only controls for known covariates which means that there is a potential for bias if some
- 2 covariates that affect the outcome are not included.

For peer review only

## 1 INTRODUCTION

2 Community-Based Rehabilitation (CBR) is a multi-sectoral approach working to equalize opportunities  
3 and include people with disabilities in all aspects of community life. It is broadly defined as “a strategy  
4 within general community development for the rehabilitation, equalization of opportunities and social  
5 inclusion of all people with disabilities”[1]. The wide scope of CBR is further expanded through the  
6 various implementing stakeholders involved in CBR, including people with disabilities themselves, their  
7 families and communities, and the relevant governmental and non-governmental service sectors. It is  
8 due, at least in part, to this extensive definition that reliable and internationally comparable data to  
9 monitor and evaluate CBR are scarce. In an effort to synthesize global perspectives on CBR, the World  
10 Health Organization (WHO) developed their “Community-Based Rehabilitation Guidelines” in 2010  
11 which have since become accepted as a conceptual framework for CBR[2]. With these guidelines, WHO  
12 emphasized the need for a common global framework for monitoring CBR in line with the Convention  
13 on the Rights of Persons with Disability (CRPD). With the launch of the global WHO CBR Indicators in  
14 2015, there is now a standardized approach to do this[3,4].

15  
16 The complexity of CBR leads to challenges in research attempting to quantify its effectiveness[5-7].  
17 Fully experimental studies with randomization are rarely possible for both ethical and practical  
18 reasons, which inherently lead to limitations. The possibility of bias arises as the apparent difference  
19 in an outcome between two treatment groups may depend on characteristics that affected whether  
20 or not an individual received a given treatment, instead of being an actual effect of the treatment. For  
21 this reason there has been a recent emphasis on so-called natural experiments, where a range of  
22 primarily statistical approaches are used to evaluate a treatment or intervention when randomization  
23 is not feasible[8]. One such approach is propensity score matching (PSM).

24 PSM was first presented in 1983 by Rosenbaum and Rubin as a method to reduce bias due to  
25 confounding variables in observational studies[9]. It attempts to mimic randomization by creating a  
26 sample of participants who received the treatment that is comparable on all observed covariates to  
27 participants who did not receive the treatment. This effectively creates an experimental dataset where  
28 the comparison group is, on average, equivalent to individuals in the exposed group on all observed  
29 covariates[10-12]. A systematic review comparing 21 PSM studies to 63 RCTs on therapeutic  
30 interventions for acute coronary syndromes found that PSM produced more extreme treatment effect  
31 estimates when compared with those from RCTs, although these differences were rarely statistically  
32 significant[13]. A similar comparison including 20 propensity-score-based studies matched to RCT  
33 results was conducted examining critical care medicine and found that propensity-score-based studies  
34 report less beneficial effects of treatment in comparison to RCTs[14]. Despite some shortcomings, PSM  
35 provides a method for evaluating complex interventions where randomization is not possible.

36 PSM has been increasingly used in various research fields, including Public Health, to evaluate complex  
37 interventions[15]. CBR is considered a complex intervention, and data collection in the field is further  
38 hindered by low resources making quantitative longitudinal data collection infeasible and rarely  
39 done[6,7,16,17]. This implies that data analysis in the field of CBR relies heavily on cross-sectional data.  
40 PSM has already been successfully applied to cross-sectional data[18,19]. Therefore, the main  
41 objective of this paper is to examine whether PSM can be an effective method to facilitate evaluations  
42 of results in CBR when data are cross-sectional. Data used in the present study were collected using  
43 the WHO CBR Indicators in Vietnam in 2016 with the assignment of persons to the treatment (CBR  
44 participants) and non-treatment group (non-CBR participants) determined by province of residence.

1  
2  
3 1 PSM will be conducted on the outcome of *community inclusion* of people with disabilities, the ultimate  
4 2 goal of CBR in strong alignment with the CRPD, using a sum score of WHO CBR social indicators and an  
5 3 empowerment indicator.  
6  
7

8 4  
9 5 **METHODS**

10  
11 6 **Data Collection**  
12 7

13  
14 8 Data collection was conducted using the survey questionnaire accompanying the WHO CBR  
15 9 Indicators[3]. These indicators examine differences in health, education, social life, livelihood and  
16 10 empowerment between people with disabilities and other community members. There are two  
17 11 subsets of indicators: base indicators which are broad and should be used in all data collection activities  
18 12 to ensure comparability, and supplementary indicators which can provide more specific coverage, and  
19 13 can be selected depending on the specific CBR goals and strategies of a program. The indicators and  
20 14 corresponding questions used in this paper are presented in table 1.

21  
22 15 This study presents a secondary analysis of data collected during a multi-site cross-sectional survey in  
23 16 2016 in two Vietnamese provinces: Huế, where CBR is fully implemented and all districts have CBR  
24 17 coverage through government implementation and through non-governmental organizations' (NGO)  
25 18 activities; and Hòa Bình, where CBR is not implemented by either government or NGOs. The Huế CBR  
26 19 program began in 2009 in cooperation with the Huế Rehabilitation Hospital. The program focused  
27 20 mainly on activities to increase capacity building for CBR workers, not only in terms of rehabilitation  
28 21 skills, but also working to improve their counselling and networking skills. The other focus of the  
29 22 program was to strengthen referral pathways for people with disabilities so that they could be  
30 23 connected with other existing services in the province, such as schools with teachers who were trained  
31 24 to support students with disabilities and vocational training centers. An Android mobile phone  
32 25 application (app), available from WHO for the CBR Indicators, was used to collect data during  
33 26 interviews (app free to download at:

34 27 <http://play.google.com/store/apps/details?id=com.universaltools.whocbrsurvey&hl=en>).  
35 28

36 29 People with disabilities were identified prior to the survey by government records. In both provinces a  
37 30 team of five local health care workers were trained by the lead researcher (CM) over two days on how  
38 31 to conduct interviews using the survey questions and the app. Data collection was supervised by CM.  
39 32 Data were collected during face-to-face interviews with data recorded anonymously. All respondents  
40 33 were informed of the purpose of the study, and then provided verbal (Huế) or written consent (Hòa  
41 34 Bình). In Huế the decision to provide verbal rather than written consent was justified since requiring  
42 35 written consent would embarrass illiterate participants, leading to a decreased willingness to answer  
43 36 further questions truthfully. In instances when the respondent had cognitive limitations that prevented  
44 37 them from being interviewed, or if the respondent was a minor, a proxy interview with a family  
45 38 member was performed. Ethical approval was obtained through the Ludwig-Maximilians-Universität  
46 39 Munich Ethics Commission and by the local provincial Ministries of Health.

47 40 **Variables**

48 41 *Outcome Variable*

49 42 To measure community inclusion, a sum score was created from the social base and supplementary  
50 43 questions, with the addition of the base question from empowerment. These questions all used the

1 same response scale of 1(*Not at all*) to 5(*Completely*) with the final sum score ranging from 4 to 33,  
2 with higher scores indicating higher levels of inclusion (table 1).

3  
4 **Table 1.** WHO CBR Indicators and questions used to measure them. Base indicators are shown in  
5 bold. The response option for all questions ranged from 1 (Not at all) to 5 (Completely).

| Component   | Indicator                                                                                             | Survey Question                                                                                                                              |
|-------------|-------------------------------------------------------------------------------------------------------|----------------------------------------------------------------------------------------------------------------------------------------------|
| Social      | <b>% of people with disability that feel valued as individuals by members of their community</b>      | Do you feel that other people respect you? For example, do you feel that others value you as a person and listen to what you have to say?    |
|             | % of people with disability who make their own decisions about the personal assistance they need      | Do you get to make decisions about the personal assistance that you need (who assists you, what type of assistance, when to get assistance)? |
|             | % of people with disability make their own decisions about their personal relationships               | Do you get to make your own decisions about your personal relationships, such as friends and family?                                         |
|             | % of people with disability who participate in artistic, cultural or religious activities             | Do you get to participate in artistic, cultural or religious activities?                                                                     |
|             | % of people with disability who participate in mainstream recreational, leisure and sports activities | Do you get to participate in community recreational, leisure and sports activities?                                                          |
|             | % of people with disability who know their legal rights                                               | To what extent do you know your legal rights?                                                                                                |
| Empowerment | <b>% of people with disability who make informed choices and decisions</b>                            | Do you get to make the big decisions in your life? For example, deciding who to live with, where to live, or how to spend your money?        |

### 6 *Matching Variables*

7 Matching variables were those available from the WHO CBR Indicators, and were selected based on  
8 their theoretical association with community inclusion and CBR group assignment, primarily using CBR  
9 Guidelines[2]. Data on *age* and *gender* were collected. Age was collected in categories (see table 2)  
10 which were dichotomized for the analysis[20]. Though data on disability severity were not available,  
11 *general health status* was used as a proxy, using the question “*How would you rate your health*  
12 *today?*”[21]. A variable for *socio-economic status* (SES) was created using a sum score based on the  
13 questions “*What is the highest level of education you have achieved or are working to achieve?*” and  
14 “*Do you have enough money to meet your needs?*”. The first question is commonly used in SES variable  
15 creation, and the second question targets wealth[22,23]. The variable *province of residence*  
16 corresponded to CBR coverage (no coverage in Hòa Bình, full CBR coverage in Huế). To account for  
17 economic differences between the provinces that might not be captured by SES, the covariate  
18 *receiving social protection* (such as for loss of income through old age, sickness or disability) was  
19 included. Covariates of *financial awareness* (knowing how to get financial services or social protection  
20 if needed), *having access to health services when needed*, and *having access to rehabilitation services*  
21 *when needed* were also included. A proxy for autonomy was captured through the covariates of *being*  
22 *involved in decision making regarding medical treatment* and *participating in a self-help group if*  
23 *desired* (see supplementary table). Seeing as the CBR program in Huế focused on increasing referral  
24 pathways within the medical and education sectors, the questions derived from the education  
25 component and many from the medical component were not included as matching variables, since  
26 including covariates associated with CBR participation but not with community inclusion decrease  
27 model precision[24].

### 28 *Missing Data*



1  
2  
3 1 Missing data were low (2.25%). Multiple imputation (five imputations) using fully conditional  
4 2 specification (MICE package [25] in R Studio Version 0.99.903) was used to replace missing data.  
5  
6 3

#### 7 4 **Analysis**

##### 9 5 *Matching on the Propensity Score*

10 6 The number of treated and untreated participants were similar (difference of n=4). Therefore,  
11 7 participants were matched using one-to-one nearest neighbour technique, which matched each  
12 8 treated unit to one control that was closest using calipers of width equal to 0.25 of the standard  
13 9 deviation (SD) of the logit of the estimated propensity score without iteration[26]. This implies that for  
14 10 a given treated participant, all the untreated participants are identified whose scores are within this  
15 11 specified distance and then the best match is formed. If no match falls within this distance the  
16 12 participant is excluded. Participants were matched on ten covariates (see *Matching Variables*).  
17  
18  
19  
20  
21

##### 21 14 *Balance Diagnostics*

22 15 Baseline comparisons between the covariates were conducted for the matched and unmatched  
23 16 samples. Balance diagnosis was performed using the standardized difference method, which compares  
24 17 the difference in means of each covariate in units of the pooled SD for the matched and unmatched  
25 18 samples[12]. Successful matching is indicated when the absolute standardized differences of means is  
26 19 less than 0.25[27].  
27  
28  
29

##### 30 21 *Comparing Groups*

31 22 For the community inclusion outcome, data matched on the ten covariates were compared using a  
32 23 paired t-test[28]. Bootstrapping was performed (1000 samples) in order to produce 95% confidence  
33 24 intervals (CI), which has been shown to account for uncertainty in the matching procedure[20].  
34 25 A sensitivity analysis was performed using the Rosenbaum Bounds for Hodges-Lehmann Point Estimate  
35 26 to assess how robust the findings were to hidden bias due to unobserved covariates ('rbounds' package  
36 27 [29] in R Studio Version 0.99.903). The maximum Gamma (the odds of differential assignment to  
37 28 treatment due to unobserved factors) was set to 2 with increments of 0.1 to test at which point the  
38 29 between group differences are no longer robust[29].  
39  
40  
41

42 30 Data cleaning was performed using SPSS version 23 (copyright IBM Corporation). PSM was performed  
43 31 in R Studio (Version 0.99.903) using the 'MatchIt' package[30].  
44  
45  
46

#### 46 33 **Patient and Public Involvement**

47  
48 34 Participants were not directly involved in the development of the research question, study design,  
49 35 recruitment or conduct of the study. However, in the province of Huế (where CBR is implemented)  
50 36 participants are continually involved in the development of the CBR program, as CBR is participatory  
51 37 in nature. It was through their motivation – stemming from the need to prove to the national  
52 38 government and international donors that their intervention has an impact in order to receive funds –  
53 39 that the survey was conducted in the first place. A study report was submitted to the Huế and Hòa  
54 40 Bình Ministries of Health which presented simple numeric and graphic descriptive findings which were  
55 41 to be communicated to participants.  
56  
57  
58  
59  
60

#### 60 43 **RESULTS**

1 Data were available from 298 participants. In Huế, 575 people with disabilities were identified by  
 2 government records and 147 were included, while in Hòa Bình 375 people were identified by  
 3 government records and 151 were included (sample size calculated using an alpha significance level of  
 4 0.05 and power of 90%). Included participants were randomly selected from the complete list. After  
 5 the random selection, each interviewer was assigned a group of selected participants based on their  
 6 geographic location. Of the randomly selected participants, one in Hòa Bình could not be contacted so  
 7 another participant was selected. In both provinces none of the invited participants refused  
 8 participation. Males comprised 153(51.3%) of the participants, with a modal age group of 45-64(28.9%)  
 9 (see table 2 for further descriptives).

10 In the unmatched sample, CBR participants had higher health status, were more likely to participate in  
 11 a self-help group, more financially aware and more likely to be receiving social protection while they  
 12 had worse access to rehabilitation services. Some age differences were also noted (table 2). In the  
 13 unmatched sample the absolute standardized difference across the 10 covariates ranged from 0.008  
 14 to 1.008 indicating bias.

15 When CBR participants were matched with non-CBR participants on the logit of the specified  
 16 propensity score model, 74 matched pairs were formed. This meant that 49.7% of CBR participants  
 17 were successfully matched to a control. PSM was successful in reducing bias between the covariates  
 18 in the matched sample, as the standardized differences ranged from 0 to 0.147 with all values falling  
 19 below the threshold value of 0.25[27] (table 2).

20 **Table 2.** Baseline characteristics of CBR participants and non-CBR participants in the unmatched and  
 21 matched samples. Absolute standardized differences of means are shown, with differences  
 22 exceeding the threshold of 0.25 indicated in bold.

| Variable                                 | Unmatched Sample  |                     |                       | Matched Sample   |                    |                       |
|------------------------------------------|-------------------|---------------------|-----------------------|------------------|--------------------|-----------------------|
|                                          | No CBR<br>(n=151) | With CBR<br>(n=147) | Std. dif. of<br>means | No CBR<br>(n=74) | With CBR<br>(n=74) | Std. dif. of<br>means |
| <b>Age</b>                               |                   |                     |                       |                  |                    |                       |
| 0-5                                      | 11 (7.2%)         | 6 (4.1%)            | 0.161                 | 3 (4.1%)         | 5 (6.8%)           | 0.136                 |
| 6-12                                     | 19 (12.6%)        | 11 (7.5%)           | 0.193                 | 7 (9.5%)         | 5 (6.8%)           | 0.102                 |
| 13-17                                    | 4 (2.6%)          | 6 (4.1%)            | 0.072                 | 2 (2.7%)         | 1 (1.4%)           | 0.068                 |
| 18-24                                    | 12 (7.9%)         | 12 (8.2%)           | 0.008                 | 7 (9.5%)         | 7 (9.5%)           | 0.000                 |
| 25-44                                    | 49 (32.5%)        | 32 (21.8%)          | <b>0.258</b>          | 23 (31.1%)       | 22 (29.7%)         | 0.033                 |
| 45-64                                    | 42 (27.8%)        | 44 (29.9%)          | 0.046                 | 21 (28.4%)       | 26 (35.1%)         | 0.147                 |
| 65+                                      | 14 (9.3%)         | 36 (24.5%)          | <b>0.353</b>          | 11 (14.9%)       | 8 (10.8%)          | 0.094                 |
| <b>Gender (male)</b>                     | 80 (53.0%)        | 73 (50.0%)          | 0.066                 | 37 (50.0%)       | 42 (56.8%)         | 0.135                 |
| <b>SES (range 1-10)</b>                  | 3.74±1.32         | 3.91±1.30           | 0.235                 | 3.65±1.45        | 3.67±1.42          | 0.020                 |
| <b>Health status (range 1-5)</b>         | 2.89±0.77         | 3.37±0.70           | <b>0.683</b>          | 3.05±0.75        | 3.14±0.65          | 0.115                 |
| <b>Receiving social protection</b>       | 74 (49.0%)        | 117 (79.6%)         | <b>1.008</b>          | 48 (64.9%)       | 52 (70.3%)         | 0.141                 |
| <b>Access to health services</b>         | 132 (87.4%)       | 126 (85.7%)         | 0.048                 | 66 (89.2%)       | 66 (89.2%)         | 0.000                 |
| <b>Access to rehabilitation services</b> | 128 (84.8%)       | 123 (83.7%)         | <b>0.263</b>          | 29 (39.2%)       | 31 (41.9%)         | 0.054                 |
| <b>Self-help group</b>                   | 63 (41.7%)        | 75 (51.0%)          | <b>0.396</b>          | 31 (41.9%)       | 32 (43.2%)         | 0.027                 |
| <b>Financial awareness</b>               | 73 (48.3%)        | 122 (83.0%)         | <b>0.789</b>          | 51 (68.9%)       | 55 (74.3%)         | 0.134                 |
| <b>Involved in treatment decisions</b>   | 47 (31.1%)        | 65 (44.2%)          | 0.137                 | 65 (87.8%)       | 65 (87.8%)         | 0.000                 |

Note: continuous variables are presented as means ± standard deviation; dichotomous variables are presented as n(%)

23 To test whether PSM affected the pre-defined outcome of community inclusion, the difference  
 24 between groups in the matched and unmatched samples were assessed: similar significant differences  
 25 were found. In the matched sample, CBR participants had worse community inclusion scores

(mean=17.86, SD=6.30, 95%CI 16.45-19.32) than non-CBR participants (mean=20.93, SD=6.16, 95%CI 19.50-22.35);  $t(73)=3.068$ ,  $p=0.001$ . The sensitivity analysis corroborated the results, showing that CBR participants had a median difference in community inclusion score 3.5 points lower than non-CBR participants (Gamma=0). When the Gamma value was increased to 2, the upper and lower bounds did not include zero indicating robust results[29]. In a further sensitivity analysis, to ensure that the covariate of "access to rehabilitation" did not bias the model by being more strongly associated with receiving CBR rather than with the outcome of community inclusion, the model was run excluding this variable. The new model resulted in 75 matched pairs with all standardized differences falling below the threshold. The results of the t-test did not differ from the model including access to rehabilitation; CBR participants had worse community inclusion scores (mean=18.11, SD=5.981, 95%CI 16.72-19.47) than non-CBR participants (mean=21.17, SD=6.381, 95%CI 19.67-22.60);  $t(74)=3.310$ ,  $p=0.0014$ .

Overall, the results did not differ from the results before PSM: community inclusion for participants with CBR (mean=18.61, SD=5.38) and without CBR (mean=20.64, SD=6.49);  $t(296)=2.935$ ,  $p=0.004$  using an independent t-test.

## DISCUSSION

To our knowledge, this study presents the first use of PSM as a method for analyzing cross-sectional data in the field of CBR. The study analyzed data collected using the WHO CBR Indicators, and found that community inclusion scores of CBR participants were significantly lower than those of non-CBR participants after PSM. Despite bias being detected in the distribution of covariates between groups in the unmatched sample, the results before PSM did not significantly differ from those after. We conclude that PSM can be successfully applied to cross-sectional CBR data, though in this case the bias reduction provided by PSM did not affect the tested outcome.

PSM has been applied only to longitudinal CBR data so far, but PSM studies using cross-sectional data are available from other fields. These studies had similar results in terms of the methodological success of PSM, but unlike our study they had final outcomes in line with their hypotheses. One such example is the study from Jalan and Ravallion which examines the effect of an employment-based poverty reduction program on income gain, accounting for pre-intervention and foregone income[19]. Through the trial of three PSM methods, they were able to reduce the differences between the two populations and to demonstrate the effectiveness of the program. Another such example is the study from Becerril and Abdulai showing the positive impact of new maize farming technologies on per capita poverty outcomes[18]. Similarly to our study, they detected bias in the distribution of covariates between groups in the unmatched sample, indicating that accounting for bias through PSM was important. In the field of CBR, PSM has been used to evaluate longitudinal CBR data in India, looking at livelihood and health outcomes[31,32]. PSM was used to reduce the bias between the CBR and non-CBR groups, with results showing that CBR participants had better health and livelihood outcomes, and that these differences generally increased over time at both four years and seven years. In our study, data was collected seven years after the program began, which would make the timing comparable and it is therefore plausible that the effect of CBR in our study could already be quantifiable. As in our study, these studies all showed bias between unmatched groups which were reduced in the matched sample after PSM. However, none of these studies presented their outcome results of the unmatched sample for comparison, so it cannot be determined if their final results were unaffected by matching as is the case in our study.

1  
2  
3 1 The results of the present study go against the anecdotal evidence that CBR has a positive influence  
4 2 on the lives of people with disabilities[6,7,33]. Results from longitudinal data indicate that CBR has a  
5 3 positive impact on receiving pensions, accessing paid jobs, accessing assistive devices, and personal-  
6 4 practical autonomy, with the impact increasing over time[31]. An explanation for our results could be  
7 5 that cross-sectional data allow for comparisons between groups at a single time-point, and even after  
8 6 PSM is applied to reduce bias the causal relationship between CBR implementation and social inclusion  
9 7 cannot be determined. While the cross-sectional data collected in this study represent the first  
10 8 quantitative data from the region and therefore an important foundation for future work, the results  
11 9 emphasizes the general need for further collection and publication of CBR data, especially longitudinal  
12 10 data. Additionally, this study focused on community inclusion - the ultimate goal of CBR - but when  
13 11 interpreting results it is also important to consider the specific targets of the program being examined.  
14 12 Though CBR aims to impact all aspects of the lives of people with disabilities to increase community  
15 13 inclusion, the program in Hué does not directly target community inclusion. The program focuses on  
16 14 increasing the capacity of CBR workers and on strengthening referral pathways with the medical and  
17 15 educational sectors. Through these activities the community inclusion of people with disabilities  
18 16 should improve over time, but since community inclusion was not the direct target of the program, the  
19 17 community inclusion effects might only appear after a longer period, which could be a reason for the  
20 18 counter-intuitive results. Therefore, when assessing a program in its early stages, it may be more  
21 19 important to match the indicators used with the specific targets of programs.

22 20 To our knowledge, this study is the first to implement the recently developed WHO CRB Indicators[4].  
23 21 The study highlights how important it is to collect standardized data in the field of CBR in order to  
24 22 facilitate comparisons between groups and determine effectiveness of programs. One of the main  
25 23 advantages of the CBR Indicators and their data collection strategy is that they are easy to use in the  
26 24 field. The indicators allow for descriptive comparisons to be made easily, but for indicators to be used  
27 25 appropriately it is important to go beyond these descriptive results using inferential statistics.  
28 26 Furthermore, no single indicator or even a set of indicators is capable of capturing all changes in  
29 27 dynamic settings. The use of indicators alone has the potential limitation of collecting meaningless or  
30 28 misleading information,[34] and therefore they should be used as part of a broad evaluation strategy,  
31 29 in combination with qualitative and participatory evaluations[33]. Another way to reduce the  
32 30 limitations arising from indicator use is to continually test and re-assess the indicators[34]. In the case  
33 31 of the CBR Indicators, a priority should be to do this in partnership with communities and people with  
34 32 disabilities in order to promote their uptake.

35 33 The use of PSM as a method for analysis of cross-sectional data collected from the CBR Indicators is  
36 34 conceptually strong, due to its ability to reduce bias due to confounding variables in observational  
37 35 studies[9]. However, the methodological limitations of PSM also need to be considered. PSM requires  
38 36 that each participant has a non-zero probability of receiving treatment, meaning only people with  
39 37 disabilities can be included in the analysis. Due to this, one of the main advantages of the CBR  
40 38 Indicators, namely the ability to use comparison individuals from the community, is lost[4].  
41 39 Furthermore, PSM only controls for known covariates which means that there is a potential for bias if  
42 40 some covariates that affect the outcome are not included[9]. For example, in this study no data were  
43 41 available on the ethnicity of participants, despite its known association with social disparities in  
44 42 Vietnam[35]. Another such covariate in this study could be disability severity, although this was  
45 43 partially adjusted for in both the participant selection, whereby all people with disabilities were  
46 44 identified using the same government disability criteria, and further in the analysis through the

1  
2  
3 1 inclusion of the self-rated health covariate. Another limitation of PSM is that it leads to reduced sample  
4 2 size which could limit generalizability, though this is partly addressed through the provided sensitivity  
5 3 analysis. The reduced sample size also increases the risk of type II error[36], but the sample size of this  
6 4 study met the commonly recommended minimum sample size of  $10(p + 1)$ , where  $p$  is the number of  
7 5 matching variables[37]. This study presents a starting point to encourage the generation of  
8 6 quantitative CBR research and demonstrates one possible method for reducing bias when analyzing  
9 7 cross-sectional CBR data. Further studies should look into additional statistical methods for analyzing  
10 8 the results obtained from the CBR Indicators.

11  
12  
13  
14 9 Based on the present study, we recommend the further use and testing of the WHO CBR Indicators to  
15 10 increase standardized data collection in the field of CBR. In accompaniment to increased data  
16 11 collection, we recommend PSM as a method to reduce bias in cross-sectional CBR data analyses,  
17 12 especially for international comparisons where differences between populations may be greater than  
18 13 the within country differences observed in this study. Since using cross-sectional data presents  
19 14 limitations even after adjusting for bias, we also emphasize the need for future longitudinal data  
20 15 collection in order to assess effectiveness in the field of CBR.

## 21 16 **CONCLUSION**

22 17 This study presents the first use of PSM as a method for analyzing cross-sectional CBR data. While  
23 18 randomized and longitudinal data are ideal for evaluations, cross-sectional data presents the  
24 19 advantage of being more feasible to collect and thereby providing an essential foundation to generate  
25 20 hypotheses and perform further studies. Therefore, it is essential that appropriate statistical methods  
26 21 are applied to capitalize on available data. The potential of using PSM for analyzing cross-sectional CBR  
27 22 data was demonstrated, though further research should investigate alternative inferential methods,  
28 23 such as cluster matching or adjusted regression, which may be more suitable in allowing for the  
29 24 comparison of the differences between persons with and without disabilities in line with the WHO CBR  
30 25 Indicators. We recommend that the questions and indicators be continually reviewed, and that future  
31 26 cross-sectional CBR studies use PSM to reduce bias when comparing groups.

## 32 27 33 28 **FUNDING**

34 29 This research received no specific grant from any funding agency in the public, commercial or not-for-  
35 30 profit sectors.

## 36 31 **COMPETING INTERESTS**

37 32 The authors declare no competing interests.

## 38 33 **DATA SHARING**

39 34 The data are owned by the World Health Organization (WHO). Data are available from the WHO for  
40 35 researchers who meet the criteria for access to confidential data. Interested researchers can access  
41 36 the data by the same means the authors accessed them, by contacting WHO under  
42 37 [disability@who.int](mailto:disability@who.int). Statistical code is available from the corresponding author.

## 43 38 **ACKNOWLEDGEMENTS**

1 The authors express gratitude to those from the Vietnamese Ministries and the local healthcare  
2 workers who lent their knowledge and field experience. Special thanks go out to the interviewers who  
3 took the time to visit and speak with the participants; in Huế: Nguyen Thi Phung Diem, Nguyen Van  
4 Hong, Thuong Thi Huong Giang, Thian Cong Chirh, and Nguyen Thi Ngoc Anh and in Hoa Binh: Ha Thi  
5 Thoan, Vu Dury Hieu, Le Tleaal Hoa, Nguyen Quoc Dung, Le Vai Huy, and Nguyen Thanh.

## 6 AUTHOR CONTRIBUTIONS

7 Conceptualization: CM JW CS  
8 Investigation: CM JW  
9 Methodology: CM JW CS  
10 Data curation: CM DMT  
11 Formal analysis: CM  
12 Project administration: CM JW CS  
13 Resources: CM JW CS DMT  
14 Supervision: CM DMT CS JW  
15 Writing – original draft: CM CS JW  
16 Writing – review & editing: CM JW CS DMT

## 18 REFERENCES

- 19 1 International Labour Organization, United Nations Educational, Scientific and Cultural Organization  
20 and the World Health Organization. CBR: A strategy for rehabilitation, equalization of  
21 opportunities, poverty reduction and social inclusion of people with disabilities: joint position  
22 paper. Geneva: World Health Organization, 2004.
- 23 2 World Health Organization, United Nations Educational, Scientific and Cultural Organization, &  
24 International Labour Organization. Community-based rehabilitation: CBR Guidelines. Geneva:  
25 World Health Organization, 2010.
- 26 3 World Health Organization, International Disability and Development Consortium. Capturing the  
27 difference we make- Community-based rehabilitation indicators manual. Geneva: World  
28 Health Organization, 2015.
- 29 4 Mason C, Weber J, Atasoy S, et al. Development of indicators for monitoring Community-Based  
30 Rehabilitation. *PLoS One* 2017;12(6):e0178418.
- 31 5 Finkenflügel H, Wolffers I, Huijsman R. The evidence base for community-based rehabilitation: a  
32 literature review. *Int J Rehabil Res* 2005;28(3):187-201.
- 33 6 Cornielje H, Velema JP, Finkenflugel H. Community based rehabilitation programmes: Monitoring  
34 and evaluation in order to measure results. *Lepr Rev* 2008;79(1):36-49.
- 35 7 Lemmi V, Blanchet K, Gibson LJ, et al. Community-based rehabilitation for people with physical and  
36 mental disabilities in low- and middle-income countries: a systematic review and meta-  
37 analysis. *Campbell Sys Rev* 2015;11(15).
- 38 8 Craig P, Cooper C, Gunnell D, et al. Using natural experiments to evaluate population health  
39 interventions: new Medical Research Council guidance. *J Epidemiol Community Health*  
40 2012;jech-2011-200375.
- 41 9 Rosenbaum PR, Rubin DB. The central role of the propensity score in observational studies for  
42 causal effects. *Biometrika* 1983;70(1):41-55.
- 43 10 Heckman JJ, Ichimura H, Todd P. Matching as an econometric evaluation estimator. *Rev Econ Stud*  
44 1998;65(2):261-94.
- 45 11 Rosenbaum PR. The role of known effects in observational studies. *Biometrics* 1989;45(2):557-69.
- 46 12 Austin PC. An introduction to propensity score methods for reducing the effects of confounding in  
47 observational studies. *Multivar Behav Research* 2011;46(3):399-424.

1  
2  
3  
4  
5  
6  
7  
8  
9  
10  
11  
12  
13  
14  
15  
16  
17  
18  
19  
20  
21  
22  
23  
24  
25  
26  
27  
28  
29  
30  
31  
32  
33  
34  
35  
36  
37  
38  
39  
40  
41  
42  
43  
44  
45  
46  
47  
48  
49  
50  
51  
52

- 13 Dahabreh IJ, Sheldrick RC, Paulus JK, et al. Do observational studies using propensity score methods agree with randomized trials? A systematic comparison of studies on acute coronary syndromes. *Eur Heart J* 2012;33(15):1893-901.
- 14 Zhang Z, Ni H, Xu X. Observational studies using propensity score analysis underestimated the effect sizes in critical care medicine. *J Clin Epidemiol* 2014;67(8):932-39.
- 15 Li M. Using the Propensity Score Method to Estimate Causal Effects A Review and Practical Guide. *Organ Res Methods* 2013;16(2):188-226.
- 16 Weber J, Polack S, Hartley S. An Online Survey on Identification of Evaluation Capacity, Needs and Current Practice of Programme Evaluation in Community-based Rehabilitation. *Disability CBR Inclusive Development* 2016;27(2):5-18.
- 17 Grandisson M, Hébert M, Thibeault R. A systematic review on how to conduct evaluations in community-based rehabilitation. *Disabil Rehabil* 2014;36(4):265-75.
- 18 Becerril J, Abdulai A. The impact of improved maize varieties on poverty in Mexico: a propensity score-matching approach. *World Devel* 2010;38(7):1024-35.
- 19 Jalan J, Ravallion M. Estimating the benefit incidence of an antipoverty program by propensity-score matching. *J Bus Econ Stat* 2003;21(1):19-30.
- 20 Stuart EA. Matching methods for causal inference: A review and a look forward. *Stat Sci* 2010;25(1):1.
- 21 Wu S, Wang R, Zhao Y, et al. The relationship between self-rated health and objective health status: a population-based study. *BMC Public Health* 2013;13(1):320.
- 22 Pollack CE, Chideya S, Cubbin C, et al. Should health studies measure wealth?: a systematic review. *Am J Prev Med* 2007;33(3):250-64.
- 23 Shavers VL. Measurement of socioeconomic status in health disparities research. *J Natl Med Assoc* 2007;99(9):1013.
- 24 Garrido M, Kelley A, Parisc J, Roza K, Meier D, Morrison R, Aldridge M. (2014). Methods for constructing and assessing propensity scores. *Health Serv Res* 2014;49(5):1701-1720.
- 25 Stef van Buuren, Karin Groothuis-Oudshoorn). mice: Multivariate Imputation by Chained Equations in R. *J Stat Softw* 2011; 45(3):1-67. URL <http://www.jstatsoft.org/v45/i03/>.
- 26 Cochran WG, Rubin DB. Controlling bias in observational studies: A review. *Sankhya Ser A* 1973;417-46.
- 27 Ho DE, Imai K, King G, et al. Matching as nonparametric preprocessing for reducing model dependence in parametric causal inference. *Polit Anal* 2007;15(3):199-236.
- 28 Austin, Peter C. A critical appraisal of propensity-score matching in the medical literature between 1996 and 2003. *Stat Med* 2008;27.12: 2037-2049.
- 29 Keele L. An overview of rbounds: An R package for Rosenbaum bounds sensitivity analysis with matched data. R package version 2.1. <https://CRAN.R-project.org/package=rbounds> r, 2010.
- 30 Ho DE, Imai K, King G, Stuart EA. MatchIt: Nonparametric Preprocessing for Parametric Causal Inference. *J Stat Softw* 2011. 42(8):1-28. URL <http://www.jstatsoft.org/v42/i08/>).
- 31 Mauro V, Biggeri M, Deepak S, et al. The effectiveness of community-based rehabilitation programmes: an impact evaluation of a quasi-randomised trial. *J Epidemiol Community Health* 2014;68(11):1102-08.
- 32 Biggeri M, Deepak S, Mauro V, et al. Do community-based rehabilitation programmes promote the participation of persons with disabilities? A case control study from Mandya District, in India. *Disabil Rehabil* 2014;36(18):1508-17.
- 33 Weber J, Grech S, Polack S. Towards a 'mind map' for evaluative thinking in Community Based Rehabilitation: reflections and learning. *Disability Global South* 2016;3(2):951-79.
- 34 Implementing the vision: Addressing challenges to results-focused management and budgeting. Implementation Challenges in Results Focused Management and Budgeting; 2002 11-12 February; Paris. OECD.
- 35 Taylor P. Social inequality in Vietnam and the challenges to reform. Singapore: Institute of Southeast Asian Studies 2004:23,212.
- 36 Streiner, DL, Norman, GR. The pros and cons of propensity scores. *Chest* 2012;142(6):1380-1382.

1  
2  
3 1 37 Tumlinson, SE, Sass, DA, Cano, SM. The search for causal inferences: Using propensity scores post  
4 2 hoc to reduce estimation error with nonexperimental research. *J Pediatr Psychol*  
5 3 2014;39(2):246-257.  
6 4  
7  
8  
9  
10  
11  
12  
13  
14  
15  
16  
17  
18  
19  
20  
21  
22  
23  
24  
25  
26  
27  
28  
29  
30  
31  
32  
33  
34  
35  
36  
37  
38  
39  
40  
41  
42  
43  
44  
45  
46  
47  
48  
49  
50  
51  
52  
53  
54  
55  
56  
57  
58  
59  
60

For peer review only



**Supplementary Table.** The WHO CBR Survey questions, response options and analysis categories for the matching variables.

| Variable                                | Survey Question and Response Options                                                                                                                                                                                                                                                                                                                                                                                       | Analysis Categories                                                                                                                                                 |
|-----------------------------------------|----------------------------------------------------------------------------------------------------------------------------------------------------------------------------------------------------------------------------------------------------------------------------------------------------------------------------------------------------------------------------------------------------------------------------|---------------------------------------------------------------------------------------------------------------------------------------------------------------------|
| Gender                                  | Record the gender of the selected participant                                                                                                                                                                                                                                                                                                                                                                              | Male=1, Female=0                                                                                                                                                    |
| Age                                     | How old are you?                                                                                                                                                                                                                                                                                                                                                                                                           | 0-5yrs=1; 6-12yrs=2; 13-17yrs=3; 18-24yrs=4; 25-44yrs=5; 45-64yrs=6; 65+yrs=7                                                                                       |
| Education Level (for creation of SES)   | What is the highest level of education you have achieved, or are working to achieve?<br><i>1=No schooling or never completed any grade; 2=Elementary education; 3=Vocational education; 4=Professional training; 5=Secondary school; 6=College; 7=University; 8=Post-graduate studies; 9=Other</i>                                                                                                                         | If respondent answered 1: score=0<br>If respondent answered 2: score=1<br>If respondent answered 3,4,5: score=2*<br>If respondent answered 6,7,8: score=3           |
| Employment Grade                        | What is your current working situation?<br><i>1=Not working and looking for work; 2=Not working for wages and not looking for paid work; 3=Working for wages or salary with an employer; 4=Working for wages, but currently on sick leave; 5=Self-employed or own-account worker; 6=Working as unpaid family member; 7=Retired because of the health condition; 8=Retired because of age; 9=Early retirement; 10=Other</i> | If respondent answered 1: score=0<br>If respondent answered 6: score=1<br>If respondent answered 2,3,4,5,7,8,9: score=2<br>If respondent answered 10: score=missing |
| Health Status (for creation of SES)     | In general, how would you rate your health today?<br><i>1 = Very good; 2 = Good; 3 = Neither poor nor good; 4 = Poor; 5 = Very poor</i>                                                                                                                                                                                                                                                                                    | Inverted                                                                                                                                                            |
| Received needed medical care            | In the last 12 months, has there been a time when you needed health care but did not get that care?<br><i>1 = Yes; 2 = No; 3 = No need for health care in the past 12 months</i>                                                                                                                                                                                                                                           | If respondent answered 1: score=0<br>If respondent answered 2 or 3: score=1                                                                                         |
| Involved in making treatment decisions  | On your last visit to a health care provider, to what extent were you involved in making decisions for your treatment?<br><i>1 (Not at all); 2; 3; 4; 5 (Completely)</i>                                                                                                                                                                                                                                                   | No transformation                                                                                                                                                   |
| Received needed rehabilitation services | In the last 12 months, has there been a time when you needed rehabilitation services, such as physical, occupational, or speech therapy, but did not get those services?<br><i>1 = Yes; 2 = No; 3 = No need for rehabilitation services in the past 12 months</i>                                                                                                                                                          | If respondent answered 1: score=0<br>If respondent answered 2 or 3: score=1                                                                                         |
| Aware of financial services             | Do you know how to get financial services such as credit, insurance, grants, and savings programs?<br><i>1 = Yes; 2 = No</i>                                                                                                                                                                                                                                                                                               | If respondent answered 1: score=1<br>If respondent answered 2: score=0                                                                                              |
| Receive social protection               | Do you currently benefit from any social protection program, such as loss of income through old age, sickness or disability?<br><i>1 = Yes; 2 = No</i>                                                                                                                                                                                                                                                                     | If respondent answered 1: score=1<br>If respondent answered 2: score=0                                                                                              |
| Participation in self-help group        | Are you a member of a self-help group?<br><i>1=Yes; 2=No, but I would like to; 3=No, I don't want to</i>                                                                                                                                                                                                                                                                                                                   | If respondent answered 1 or 3: score=1<br>If respondent answered 2: score=0                                                                                         |

## STROBE Statement—checklist of items that should be included in reports of observational studies

|                              | Item No | Recommendation                                                                                                                                                                                                                                                                                                                                                                                                                                                                                                                                                                                                                                                                                                        |
|------------------------------|---------|-----------------------------------------------------------------------------------------------------------------------------------------------------------------------------------------------------------------------------------------------------------------------------------------------------------------------------------------------------------------------------------------------------------------------------------------------------------------------------------------------------------------------------------------------------------------------------------------------------------------------------------------------------------------------------------------------------------------------|
| <b>Title and abstract</b>    | 1       | (a) Indicate the study's design with a commonly used term in the title or the abstract<br>Pg 1, 1-3<br>(b) Provide in the abstract an informative and balanced summary of what was done and what was found<br>Pg 2, 3-28                                                                                                                                                                                                                                                                                                                                                                                                                                                                                              |
| <b>Introduction</b>          |         |                                                                                                                                                                                                                                                                                                                                                                                                                                                                                                                                                                                                                                                                                                                       |
| Background/rationale         | 2       | Explain the scientific background and rationale for the investigation being reported<br>Pg 4, 2-39                                                                                                                                                                                                                                                                                                                                                                                                                                                                                                                                                                                                                    |
| Objectives                   | 3       | State specific objectives, including any prespecified hypotheses<br>Pg 4, 40- pg 5, 3                                                                                                                                                                                                                                                                                                                                                                                                                                                                                                                                                                                                                                 |
| <b>Methods</b>               |         |                                                                                                                                                                                                                                                                                                                                                                                                                                                                                                                                                                                                                                                                                                                       |
| Study design                 | 4       | Present key elements of study design early in the paper<br>Pg 5, 7-8; 14                                                                                                                                                                                                                                                                                                                                                                                                                                                                                                                                                                                                                                              |
| Setting                      | 5       | Describe the setting, locations, and relevant dates, including periods of recruitment, exposure, follow-up, and data collection<br>Pg 5, 14-37                                                                                                                                                                                                                                                                                                                                                                                                                                                                                                                                                                        |
| Participants                 | 6       | (a) <i>Cohort study</i> —Give the eligibility criteria, and the sources and methods of selection of participants. Describe methods of follow-up<br><i>Case-control study</i> —Give the eligibility criteria, and the sources and methods of case ascertainment and control selection. Give the rationale for the choice of cases and controls<br><i>Cross-sectional study</i> —Give the eligibility criteria, and the sources and methods of selection of participants<br>Pg 5, 27; pg 8, 5<br>(b) <i>Cohort study</i> —For matched studies, give matching criteria and number of exposed and unexposed<br><i>Case-control study</i> —For matched studies, give matching criteria and the number of controls per case |
| Variables                    | 7       | Clearly define all outcomes, exposures, predictors, potential confounders, and effect modifiers. Give diagnostic criteria, if applicable<br>Pg 5, 40- pg 6, 23; Supplementary Table                                                                                                                                                                                                                                                                                                                                                                                                                                                                                                                                   |
| Data sources/<br>measurement | 8*      | For each variable of interest, give sources of data and details of methods of assessment (measurement). Describe comparability of assessment methods if there is more than one group<br>Pg 5, 7-13                                                                                                                                                                                                                                                                                                                                                                                                                                                                                                                    |
| Bias                         | 9       | Describe any efforts to address potential sources of bias<br>Pg 7, 20-27 → The analysis uses PSM, a method to reduce bias                                                                                                                                                                                                                                                                                                                                                                                                                                                                                                                                                                                             |
| Study size                   | 10      | Explain how the study size was arrived at<br>Pg 8, 2-5                                                                                                                                                                                                                                                                                                                                                                                                                                                                                                                                                                                                                                                                |
| Quantitative variables       | 11      | Explain how quantitative variables were handled in the analyses. If applicable, describe which groupings were chosen and why<br>Pg 5, 40- pg 6, 23; Supplementary Table                                                                                                                                                                                                                                                                                                                                                                                                                                                                                                                                               |
| Statistical methods          | 12      | (a) Describe all statistical methods, including those used to control for confounding                                                                                                                                                                                                                                                                                                                                                                                                                                                                                                                                                                                                                                 |

1  
2  
3  
4  
5  
6  
7  
8  
9  
10  
11  
12  
13  
14  
15  
16  
17  
18  
19  
20  
21  
22  
23  
24  
25  
26  
27  
28  
29  
30  
31  
32  
33  
34  
35  
36  
37  
38  
39  
40  
41  
42  
43  
44  
45  
46  
47  
48  
49  
50  
51  
52  
53  
54  
55  
56  
57  
58  
59  
60

Pg 6, 6-29

---

(b) Describe any methods used to examine subgroups and interactions

---

(c) Explain how missing data were addressed

Pg 7, 1-2

---

(d) *Cohort study*—If applicable, explain how loss to follow-up was addressed

*Case-control study*—If applicable, explain how matching of cases and controls was addressed

*Cross-sectional study*—If applicable, describe analytical methods taking account of sampling strategy

---

(e) Describe any sensitivity analyses

Pg 7, 23-27; pg 9, 8-14

Continued on next page

For peer review only

**Results**

|                  |     |                                                                                                                                                                                                                           |
|------------------|-----|---------------------------------------------------------------------------------------------------------------------------------------------------------------------------------------------------------------------------|
| Participants     | 13* | (a) Report numbers of individuals at each stage of study—eg numbers potentially eligible, examined for eligibility, confirmed eligible, included in the study, completing follow-up, and analysed<br>Pg 8, 2-4            |
|                  |     | (b) Give reasons for non-participation at each stage<br>Pg 8, 7-8                                                                                                                                                         |
|                  |     | (c) Consider use of a flow diagram                                                                                                                                                                                        |
| Descriptive data | 14* | (a) Give characteristics of study participants (eg demographic, clinical, social) and information on exposures and potential confounders<br>Pg 8, 9-10, 21-25                                                             |
|                  |     | (b) Indicate number of participants with missing data for each variable of interest<br>Pg 7, 1-2                                                                                                                          |
|                  |     | (c) <i>Cohort study</i> —Summarise follow-up time (eg, average and total amount)                                                                                                                                          |
| Outcome data     | 15* | <i>Cohort study</i> —Report numbers of outcome events or summary measures over time                                                                                                                                       |
|                  |     | <i>Case-control study</i> —Report numbers in each exposure category, or summary measures of exposure                                                                                                                      |
|                  |     | <i>Cross-sectional study</i> —Report numbers of outcome events or summary measures<br>Pg 5, 40- pg 6, 2                                                                                                                   |
| Main results     | 16  | (a) Give unadjusted estimates and, if applicable, confounder-adjusted estimates and their precision (eg, 95% confidence interval). Make clear which confounders were adjusted for and why they were included<br>Pg 9, 1-5 |
|                  |     | (b) Report category boundaries when continuous variables were categorized                                                                                                                                                 |
|                  |     | (c) If relevant, consider translating estimates of relative risk into absolute risk for a meaningful time period                                                                                                          |
| Other analyses   | 17  | Report other analyses done—eg analyses of subgroups and interactions, and sensitivity analyses<br>Pg 9, 5-14                                                                                                              |

**Discussion**

|                  |    |                                                                                                                                                                                                         |
|------------------|----|---------------------------------------------------------------------------------------------------------------------------------------------------------------------------------------------------------|
| Key results      | 18 | Summarise key results with reference to study objectives<br>Pg 9, 20-26                                                                                                                                 |
| Limitations      | 19 | Discuss limitations of the study, taking into account sources of potential bias or imprecision. Discuss both direction and magnitude of any potential bias<br>Pg 10, 7-22; 29-33; pg 10, 38- pg 11, 1-7 |
| Interpretation   | 20 | Give a cautious overall interpretation of results considering objectives, limitations, multiplicity of analyses, results from similar studies, and other relevant evidence<br>Pg 11, 8-18               |
| Generalisability | 21 | Discuss the generalisability (external validity) of the study results<br>Pg 11, 4-6                                                                                                                     |

**Other information**

|         |    |                                                                                                                                                                               |
|---------|----|-------------------------------------------------------------------------------------------------------------------------------------------------------------------------------|
| Funding | 22 | Give the source of funding and the role of the funders for the present study and, if applicable, for the original study on which the present article is based<br>Pg 11, 32-33 |
|---------|----|-------------------------------------------------------------------------------------------------------------------------------------------------------------------------------|

1  
2 \*Give information separately for cases and controls in case-control studies and, if applicable, for exposed and  
3 unexposed groups in cohort and cross-sectional studies.  
4

5 **Note:** An Explanation and Elaboration article discusses each checklist item and gives methodological background and  
6 published examples of transparent reporting. The STROBE checklist is best used in conjunction with this article (freely  
7 available on the Web sites of PLoS Medicine at <http://www.plosmedicine.org/>, Annals of Internal Medicine at  
8 <http://www.annals.org/>, and Epidemiology at <http://www.epidem.com/>). Information on the STROBE Initiative is  
9 available at [www.strobe-statement.org](http://www.strobe-statement.org).  
10  
11  
12  
13  
14  
15  
16  
17  
18  
19  
20  
21  
22  
23  
24  
25  
26  
27  
28  
29  
30  
31  
32  
33  
34  
35  
36  
37  
38  
39  
40  
41  
42  
43  
44  
45  
46  
47  
48  
49  
50  
51  
52  
53  
54  
55  
56  
57  
58  
59  
60
