# Supplementary material for: Can propensity score matching be applied to cross-sectional data to evaluate Community-Based Rehabilitation? Results of a survey implementing the WHO’s Community-Based Rehabilitation indicators in Vietnam
Source: PubMed Central journal article supplement — BMJ Open. 2019 Feb 1;9(1):e022544. doi: 10.1136/bmjopen-2018-022544 (PMC6361336; doi:10.1136/bmjopen-2018-022544), 2019-02-01
Supplement: bmjopen-2018-022544supp001.pdf [file bmjopen-2018-022544supp001.pdf]

**Supplementary Table.** The WHO CBR Survey questions, response options and analysis categories for the matching variables.

| Variable                                | Survey Question and Response Options                                                                                                                                                                                                                                                                                                                                                                                       | Analysis Categories                                                                                                                                                 |
|-----------------------------------------|----------------------------------------------------------------------------------------------------------------------------------------------------------------------------------------------------------------------------------------------------------------------------------------------------------------------------------------------------------------------------------------------------------------------------|---------------------------------------------------------------------------------------------------------------------------------------------------------------------|
| Gender                                  | Record the gender of the selected participant                                                                                                                                                                                                                                                                                                                                                                              | Male=1, Female=0                                                                                                                                                    |
| Age                                     | How old are you?                                                                                                                                                                                                                                                                                                                                                                                                           | 0-5yrs=1; 6-12yrs=2; 13-17yrs=3; 18-24yrs=4; 25-44yrs=5; 45-64yrs=6; 65+yrs=7                                                                                       |
| Education Level (for creation of SES)   | What is the highest level of education you have achieved, or are working to achieve?<br><i>1=No schooling or never completed any grade; 2=Elementary education; 3=Vocational education; 4=Professional training; 5=Secondary school; 6=College; 7=University; 8=Post-graduate studies; 9=Other</i>                                                                                                                         | If respondent answered 1: score=0<br>If respondent answered 2: score=1<br>If respondent answered 3,4,5: score=2*<br>If respondent answered 6,7,8: score=3           |
| Employment Grade                        | What is your current working situation?<br><i>1=Not working and looking for work; 2=Not working for wages and not looking for paid work; 3=Working for wages or salary with an employer; 4=Working for wages, but currently on sick leave; 5=Self-employed or own-account worker; 6=Working as unpaid family member; 7=Retired because of the health condition; 8=Retired because of age; 9=Early retirement; 10=Other</i> | If respondent answered 1: score=0<br>If respondent answered 6: score=1<br>If respondent answered 2,3,4,5,7,8,9: score=2<br>If respondent answered 10: score=missing |
| Health Status (for creation of SES)     | In general, how would you rate your health today?<br><i>1 = Very good; 2 = Good; 3 = Neither poor nor good; 4 = Poor; 5 = Very poor</i>                                                                                                                                                                                                                                                                                    | Inverted                                                                                                                                                            |
| Received needed medical care            | In the last 12 months, has there been a time when you needed health care but did not get that care?<br><i>1 = Yes; 2 = No; 3 = No need for health care in the past 12 months</i>                                                                                                                                                                                                                                           | If respondent answered 1: score=0<br>If respondent answered 2 or 3: score=1                                                                                         |
| Involved in making treatment decisions  | On your last visit to a health care provider, to what extent were you involved in making decisions for your treatment?<br><i>1 (Not at all); 2; 3; 4; 5 (Completely)</i>                                                                                                                                                                                                                                                   | No transformation                                                                                                                                                   |
| Received needed rehabilitation services | In the last 12 months, has there been a time when you needed rehabilitation services, such as physical, occupational, or speech therapy, but did not get those services?<br><i>1 = Yes; 2 = No; 3 = No need for rehabilitation services in the past 12 months</i>                                                                                                                                                          | If respondent answered 1: score=0<br>If respondent answered 2 or 3: score=1                                                                                         |
| Aware of financial services             | Do you know how to get financial services such as credit, insurance, grants, and savings programs?<br><i>1 = Yes; 2 = No</i>                                                                                                                                                                                                                                                                                               | If respondent answered 1: score=1<br>If respondent answered 2: score=0                                                                                              |
| Receive social protection               | Do you currently benefit from any social protection program, such as loss of income through old age, sickness or disability?<br><i>1 = Yes; 2 = No</i>                                                                                                                                                                                                                                                                     | If respondent answered 1: score=1<br>If respondent answered 2: score=0                                                                                              |
| Participation in self-help group        | Are you a member of a self-help group?<br><i>1=Yes; 2=No, but I would like to; 3=No, I don't want to</i>                                                                                                                                                                                                                                                                                                                   | If respondent answered 1 or 3: score=1<br>If respondent answered 2: score=0                                                                                         |
